# Supplementary material
Source: PubMed Central journal article supplement (PMC5813806)
Supplement: NIHMS914178-supplement-Supporting_Information.pdf [file NIHMS914178-supplement-Supporting_Information.pdf]

## Supplementary Information

Supplementary information on synthesis and  $^1\text{H}$  NMR validation of samples.

### Compound **SK032**•HCl

#### *Step 1.*

A mixture of benzyl bromide **1b** (724 mg, 2.90 mmol),  $\text{K}_2\text{CO}_3$  (440 mg, 3.18 mmol), and 2,4-pentanedione (0.33 mL, 3.20 mmol) in EtOH (7.2 mL) was heated at reflux for 20 h. The reaction mixture was then cooled to room temperature, concentrated, and diluted with EtOAc (50 mL)/water (50 mL). The organic layer was separated, washed with brine, dried over  $\text{Na}_2\text{SO}_4$ , concentrated, and purified via column chromatography (10:1 to 8:1 hexanes/EtOAc) to afford product **2b** as a yellow oil (451 mg, 69%), which was used directly in the next step.<sup>1</sup>

#### *Step 2.*

A mixture of **2b** (451 mg, 1.99 mmol) and  $\text{NH}_4\text{OAc}$  (1.84 g, 23.9 mmol) in MeOH (10 mL) was first stirred at room temperature for 30 min, cooled to  $0^\circ\text{C}$ , and added  $\text{NaBH}_3\text{CN}$  (624 mg, 9.93 mmol). The resulting mixture was warmed to room temperature and stirred overnight. The reaction mixture was then quenched/acidified with 2 M HCl (to pH  $\sim$ 1) and washed with  $\text{Et}_2\text{O}$ . The aqueous layer was separated, basified with 3 M NaOH (to pH  $\sim$ 14), and extracted with  $\text{CH}_2\text{Cl}_2$  (30 mL  $\times$  3). The combined organic layers were dried over  $\text{Na}_2\text{SO}_4$ , and concentrated to afford the crude product **SK032** (278 mg, 62%), which was used directly in the next step.<sup>2</sup>

#### *Step 3.*

To a solution of **SK032** (278 mg, 1.22 mmol) in  $\text{Et}_2\text{O}$  (12 mL) at  $0^\circ\text{C}$  was added 2 M HCl in  $\text{Et}_2\text{O}$  (1.2 mL, 2.4 mmol) dropwise. The resulting solid was collected by filtration, washed with  $\text{Et}_2\text{O}$ , and dried to afford **SK032**•HCl as a white solid:  $^1\text{H}$  NMR (500 MHz,  $\text{CDCl}_3$ ) for **SK032**•HCl  $\delta$  8.55 (s, 3H), 7.49 (dd,  $J = 8.0, 1.0$  Hz, 1H), 7.29 (dd,  $J = 7.6, 1.5$  Hz, 1H), 7.17 (td,  $J = 7.5, 1.0$  Hz, 1H), 7.04 (td,  $J = 7.7, 1.6$  Hz, 1H), 3.45 – 3.34 (m, 1H), 2.96 – 2.80 (m, 2H), 2.15 – 2.05 (m, 1H), 2.02 – 1.91 (m, 1H), 1.49 (d,  $J = 6.6$  Hz, 3H);  $^{13}\text{C}$  NMR (125 MHz,  $\text{CDCl}_3$ ) for **SK032**•HCl  $\delta$  139.52, 132.89, 130.48, 128.06, 127.66, 124.24, 48.13, 35.05, 32.13, 18.92; HRMS (ES) for **SK032**  $m/z$  ( $\text{M}+\text{H}$ )<sup>+</sup> calculated 228.0388, observed 228.0385.

### Compound **SK058**•HCl

Compound **SK058**•HCl was prepared following a procedure analogous to the one used for **SK032**•HCl, using benzyl bromide **1a** instead of benzyl bromide **1b** as starting material:  $^1\text{H}$  NMR (500 MHz,  $\text{CDCl}_3$ ) for **SK058**•HCl  $\delta$  8.45 (s, 3H), 7.24 (dd,  $J = 12.4, 5.0$  Hz, 1H), 7.15 (q,  $J = 7.2$  Hz, 1H), 6.98 (dt,  $J = 22.9, 8.0$  Hz, 2H), 3.36 (s, 1H), 2.86 – 2.72 (m, 2H), 2.15 (s, 1H),

1.94 (s, 1H), 1.45 (d,  $J = 3.1$  Hz, 3H); HRMS (ES) for **SK058**  $m/z$  (M+H)<sup>+</sup> calculated 168.1189, observed 168.1190.

### Compound SK052•HCl

Compound **SK052•HCl** was prepared following a procedure analogous to the one used for **SK032•HCl**, using benzyl bromide **1c** instead of benzyl bromide **1b** as starting material: <sup>1</sup>H NMR (500 MHz, CDCl<sub>3</sub>) for **SK052•HCl**  $\delta$  8.55 (s, 3H), 7.77 (d,  $J = 7.9$  Hz, 1H), 7.30 – 7.26 (m, 1H), 7.20 (t,  $J = 7.4$  Hz, 1H), 6.90 – 6.83 (m, 1H), 3.48 – 3.37 (m, 1H), 2.93 – 2.80 (m, 2H), 2.13 – 2.03 (m, 1H), 2.01 – 1.88 (m, 1H), 1.50 (d,  $J = 6.5$  Hz, 3H); <sup>13</sup>C NMR (125 MHz, CDCl<sub>3</sub>) for **SK052•HCl**  $\delta$  142.79, 139.59, 129.58, 128.60, 128.20, 100.27, 48.11, 36.70, 35.36, 18.97; HRMS (ES) for **SK052**  $m/z$  (M+H)<sup>+</sup> calculated 276.0249, observed 276.0247.

### Compound SK041•HCl

Compound **SK041•HCl** was prepared following a procedure analogous to the one used for **SK032•HCl**, using benzyl chloride **3** instead of benzyl bromide **1b** as starting material: <sup>1</sup>H NMR (500 MHz, CDCl<sub>3</sub>) for **SK041•HCl**  $\delta$  8.41 (s, 3H), 7.20 – 7.12 (m, 2H), 6.87 – 6.78 (m, 2H), 3.80 (s, 3H), 3.33 – 3.23 (m, 1H), 2.83 – 2.67 (m, 2H), 2.16 – 2.07 (m, 1H), 1.92 – 1.85 (m, 1H), 1.45 (d,  $J = 6.5$  Hz, 3H); <sup>13</sup>C NMR (125 MHz, CDCl<sub>3</sub>) for **SK041•HCl**  $\delta$  157.29, 130.10, 128.54, 127.54, 120.61, 110.32, 55.26, 48.04, 35.23, 26.25, 18.78; HRMS (ES) for **SK041**  $m/z$  (M+H)<sup>+</sup> calculated 180.1388, observed 180.1382.

### Compound SK182

A mixture of **SK041•HCl** in 48% HBr in H<sub>2</sub>O (1.80 mL) was stirred at 100°C for 5 h until completion. The reaction mixture was then concentrated, and the crude residue was purified via HPLC (MeCN/H<sub>2</sub>O) to afford the product as a purple solid: <sup>1</sup>H NMR (500 MHz, MeOD) for **SK182**  $\delta$  7.09 (dd,  $J = 7.7, 1.6$  Hz, 1H), 7.04 (td,  $J = 7.9, 1.7$  Hz, 1H), 6.81 – 6.74 (m, 2H), 3.27 – 3.18 (m, 1H), 2.78 – 2.64 (m, 2H), 2.00 – 1.92 (m, 1H), 1.86 – 1.77 (m, 1H), 1.33 (d,  $J = 6.6$  Hz, 3H); <sup>13</sup>C NMR (125 MHz, MeOD) for **SK182**  $\delta$  156.30, 131.12, 128.61, 127.96, 120.79, 115.93, 48.62, 36.43, 27.12, 18.76; HRMS (ES) for **SK182**  $m/z$  (M+H)<sup>+</sup> calculated 166.1232, observed 166.1237.

### Compound SK213•HCl

#### Step 1.

A mixture of benzyl bromide **6** (1.5 g 7.30 mmol), K<sub>2</sub>CO<sub>3</sub> (1.1 g, 7.96 mmol), and 2,4-pentanedione (0.83 mL, 8.06 mmol) in EtOH (18 mL) was heated at reflux for 20 h. The reaction mixture was then cooled to room temperature, concentrated, and diluted with EtOAc (50 mL)/water (50 mL). The organic layer was separated, washed with brine, dried over Na<sub>2</sub>SO<sub>4</sub>,

concentrated, and purified via column chromatography (10:1 to 8:1 hexanes/EtOAc) to afford product **7** as a yellow oil (1.04 g, 78%), which was used directly in the next step.

#### *Step 2.*

A mixture of **7** (155 mg, 0.85 mmol), and MeNH<sub>2</sub>HCl (458 mg, 6.78 mmol) in MeOH (4.2 mL) was first stirred at room temperature for 30 min, cooled to 0°C, and added NaBH<sub>3</sub>CN (160 mg, 2.55 mmol). The resulting mixture was warmed to room temperature, and stirred overnight. The reaction mixture was then quenched/acidified with 2 M HCl (to pH ~1), and washed with Et<sub>2</sub>O. The aqueous layer was separated, basified with 3 M NaOH (to pH ~14), and extracted with CH<sub>2</sub>Cl<sub>2</sub> (30 mL × 3). The combined organic layers were dried over Na<sub>2</sub>SO<sub>4</sub>, and concentrated to afford the crude product **SK213** (126 mg, 75%), which was used directly in the next step.

#### *Step 3.*

To a solution of **SK213** (126 mg, 0.64 mmol) in Et<sub>2</sub>O (3.2 mL) at 0°C was added 4 M HCl in 1,4-dioxane (0.32 mL, 1.28 mmol) dropwise. The resulting solid was collected by filtration, washed with Et<sub>2</sub>O, and dried to afford **SK213•HCl** as a white solid: <sup>1</sup>H NMR (500 MHz, CDCl<sub>3</sub>) for **SK213•HCl** δ 9.58 (s, 2H), 7.33 (dd, *J* = 7.5, 1.7 Hz, 1H), 7.28 (dd, *J* = 7.3, 1.9 Hz, 1H), 7.20 – 7.13 (m, 2H), 3.19 – 3.09 (m, 1H), 2.94 – 2.79 (m, 2H), 2.63 (t, *J* = 5.6 Hz, 3H), 2.28 – 2.18 (m, 1H), 2.03 – 1.93 (m, 1H), 1.50 (d, *J* = 6.6 Hz, 3H); <sup>13</sup>C NMR (125 MHz, CDCl<sub>3</sub>) for the free base **SK213** δ 140.02, 133.86, 130.24, 129.47, 127.23, 126.78, 54.60, 36.55, 33.68, 30.03, 19.71; HRMS (ES) for **SK213** *m/z* (M+H)<sup>+</sup> calculated 198.1050, observed 198.1049.

### **Compound SK220**

#### *Step 1.*

To a mixture of benzyl chloride **8** (2.0 mL, 14.4 mmol) and β-keto ester **9** (3.4 mL, 21.3 mmol) in THF (36 mL) at room temperature was added NaH (60%, 690 mg, 17.3 mmol), followed by TBAI (531 mg, 1.44 mmol). The reaction mixture was then heated at reflux overnight until completion. The resulting mixture was cooled to room temperature, concentrated, and diluted with EtOAc (50 mL)/water (50 mL). The organic layer was separated, washed with brine, dried over Na<sub>2</sub>SO<sub>4</sub>, and concentrated to afford the crude intermediate **10**, which was used directly in the next step.<sup>3</sup>

#### *Step 2.*

The crude intermediate **10** from the previous step was dissolved in EtOH (50 mL)/H<sub>2</sub>O (2.8 mL), and added KOH (4.0 g, 71.3 mmol). The reaction mixture was heated at reflux for 4 h, cooled to room temperature, concentrated, and diluted with EtOAc (50 mL)/water (50 mL). The organic layer was separated, washed with brine, dried over Na<sub>2</sub>SO<sub>4</sub>, concentrated, and purified via

column chromatography (10:1 to 8:1 hexanes/EtOAc) to afford product **11** as a yellow oil (1.51 g, 51% two steps), which was used directly in the next step.<sup>4</sup>

#### *Step 3.*

A mixture of **11** (576 mg, 2.80 mmol) and NH<sub>4</sub>OAc (1.30 g, 16.9 mmol) in MeOH (10 mL) was first stirred at room temperature for 30 min, cooled to 0°C, and added NaBH<sub>3</sub>CN (396 mg, 6.30 mmol). The resulting mixture was warmed to room temperature, and stirred overnight. The reaction mixture was then quenched/acidified with 2 M HCl (to pH ~1), and washed with Et<sub>2</sub>O. The aqueous layer was separated, basified with 3 M NaOH (to pH ~14), and extracted with CH<sub>2</sub>Cl<sub>2</sub> (30 mL × 3). The combined organic layers were dried over Na<sub>2</sub>SO<sub>4</sub>, and concentrated to afford the crude product **12** (192 mg, 33%), which was used directly in the next step.

#### *Step 4.*

The crude material **12** from the previous step (55 mg, 0.26 mmol) was dissolved in 48% HBr in H<sub>2</sub>O (2.6 mL), and the reaction mixture was stirred at 100°C for 5 h until completion. The reaction mixture was then cooled to room temperature, concentrated, and purified via HPLC (MeCN/H<sub>2</sub>O) to afford the product **SK220** as a yellow solid: <sup>1</sup>H NMR (500 MHz, CDCl<sub>3</sub>) for **SK220** δ 7.88 (s, 3H), 7.11 – 7.06 (m, 1H), 7.06 – 6.99 (m, 2H), 6.87 – 6.80 (m, 1H), 3.25 – 3.12 (m, 1H), 2.91 – 2.82 (m, 1H), 2.71 – 2.60 (m, 1H), 2.20 – 2.08 (m, 1H), 1.93 – 1.78 (m, 2H), 1.70 – 1.59 (m, 1H), 1.39 – 1.22 (m, 2H), 0.77 (t, *J* = 7.3 Hz, 3H); <sup>13</sup>C NMR (125 MHz, CDCl<sub>3</sub>) for **SK220** δ 153.37, 130.27, 127.86, 126.21, 121.26, 116.12, 51.93, 35.11, 33.22, 25.29, 18.79, 13.52; HRMS (ES) for **SK220** *m/z* (M+H)<sup>+</sup> calculated 194.1545, observed 194.1548.

### **Compound SK232•HCl**

#### *Step 1.*

To a solution of reagent **14** (1.8 mL, 7.06 mmol) in DMF (7.7 mL) at room temperature was added NaH (60%, 242 mg, 6.05 mmol). The resulting mixture was then heated to 90°C, followed by the addition of compound **13** (0.35 mL, 2.33 mmol). The reaction mixture was stirred at 90°C for another 4 h, cooled to room temperature, diluted with EtOAc (50 mL), and washed with water. The organic layer was separated, dried over Na<sub>2</sub>SO<sub>4</sub>, concentrated, and purified via column chromatography (8:1 to 6:1 hexanes/EtOAc) to afford the product **15** as a colorless oil (865 mg, 90%).<sup>5</sup>

#### *Step 2.*

To a solution of **15** (342 mg, 0.83 mmol) in DMF (2.1 mL) at room temperature was added LiBr (79 mg, 0.91 mmol) and H<sub>2</sub>O (30 μL, 1.67 mmol). The reaction mixture was then stirred and heated to 150°C overnight until completion. The resulting mixture was then cooled to room temperature, diluted with EtOAc (50 mL), and washed with water. The organic layer was

separated, dried over Na<sub>2</sub>SO<sub>4</sub>, concentrated, and purified via column chromatography (6:1 hexanes/EtOAc) to afford the product **16** as a colorless oil (178 mg, 63%).<sup>6</sup>

### Step 3.

To a solution of **16** (178 mg, 0.43 mmol) in Et<sub>2</sub>O (8.6 mL) at 0°C was added LiAlH<sub>4</sub> (33 mg, 0.87 mmol). The reaction mixture was warmed to room temperature, and stirred for 1 h until completion. The reaction mixture was then quenched by successive addition of H<sub>2</sub>O (34 μL), 15% NaOH in H<sub>2</sub>O (34 μL), and H<sub>2</sub>O (102 μL). The resulting solid was removed by filtration, and the filtrate solution was concentrated, and purified via column chromatography (2:1 hexanes/EtOAc with 1% EtOH to 4:3 hexanes/EtOAc with 1% EtOH) to afford the product **Boc-SK232** as a slightly orange oil (122 mg, 95%).

### Step 4.

A mixture of **Boc-SK232** (122 mg, 0.41 mmol) in 4.0 M HCl in 1,4-dioxane (4.1 mL) was stirred at room temperature for 30 min until completion. The reaction mixture was then concentrated, and the resulting solid was washed with Et<sub>2</sub>O to afford **SK232•HCl** as a white solid: <sup>1</sup>H NMR (500 MHz, MeOD) for **SK232•HCl** δ 7.36 (d, *J* = 17.4, 7.6, 1.5 Hz, 2H), 7.30 – 7.18 (m, 2H), 3.84 (dd, *J* = 11.7, 3.7 Hz, 1H), 3.65 (dd, *J* = 11.7, 6.6 Hz, 1H), 3.31 – 3.22 (m, 1H), 2.87 (m, 2H), 2.03 – 1.86 (m, 2H); <sup>13</sup>C NMR (125 MHz, MeOD) for **SK232•HCl** δ 139.42, 134.75, 131.61, 130.66, 129.25, 128.43, 61.91, 54.31, 30.75, 30.43; HRMS (ES) for **SK232** *m/z* (M+H)<sup>+</sup> calculated 200.0842, observed 200.0844.

### Compound SK609•HCl

Compound **SK609•HCl** was prepared following a procedure analogous to the one used for **SK032•HCl**, step 3, using commercially available compound **SK609** as starting material: <sup>1</sup>H NMR (500 MHz, CDCl<sub>3</sub>) for **SK609•HCl** δ 8.54 (s, 3H), 7.35 – 7.25 (m, 2H), 7.16 – 7.04 (m, 2H), 3.44 – 3.30 (m, 1H), 2.98 – 2.76 (m, 2H), 2.15 – 2.03 (m, 1H), 2.01 – 1.88 (m, 1H), 1.48 (d, *J* = 6.5 Hz, 3H); <sup>13</sup>C NMR (125 MHz, CDCl<sub>3</sub>) for **SK609•HCl** δ 137.78, 133.77, 130.49, 129.57, 127.82, 126.99, 48.13, 34.91, 29.61, 18.91; HRMS (ES) for **SK609** *m/z* (M+H)<sup>+</sup> calculated 184.0893, observed 184.0893.

### References:

1. Solé D, Vallverdú L, Solans X, Font-Bardía M, Bonjoch J. (2003) Intramolecular Pd-mediated processes of amino-tethered aryl halides and ketones: insight into the ketone alpha-arylation and carbonyl-addition dichotomy. A new class of four-membered azapalladacycles. *J Am Chem Soc.* 125(6):1587-1594.

2. Lemen GS, Wolfe JP. (2011) Cascade intramolecular N-arylation/intermolecular carboamination reactions for the construction of tricyclic heterocycles. *Org Lett.*13(12):3218-3221.
3. Kuroita, T.; Sakamoto, H.; Igawa, H.; Sasaki, M.; Asano, K.; Maekawa, T.; Fuji, K. PCT Int. Appl. Crystalline compound WO 2009133970 A1
4. Cordes, J.; Wessel, C.; Harms, K.; Koert, U. (2008) meta-Selective Aromatic Borylation as Key Step in the Synthesis of Poipuol Synthesis, 14, 2217 - 2220
5. Zivkovic, A.; Stark, H. (2010) Efficient chromatography-free synthesis of the oxy-analogue of fingolimod *Tetrahedron Lett.*, 51, 3769- 3771.
6. Chen, R.; Lee, V.; Adlington, R. M.; Baldwin, J. E. (2007); A Facile Synthesis of Ethyl 2-Acetamido-4-methylenehex-5-enoate, a Versatile Diels-Alder Synthon for the Parallel Synthesis of Novel  $\alpha$ -Amino Acid Derivatives; *Synthesis*, 1, 113-117.

IT-XM-032(2)/1  
IT-XM-032(2), cdcl3, 500mhz

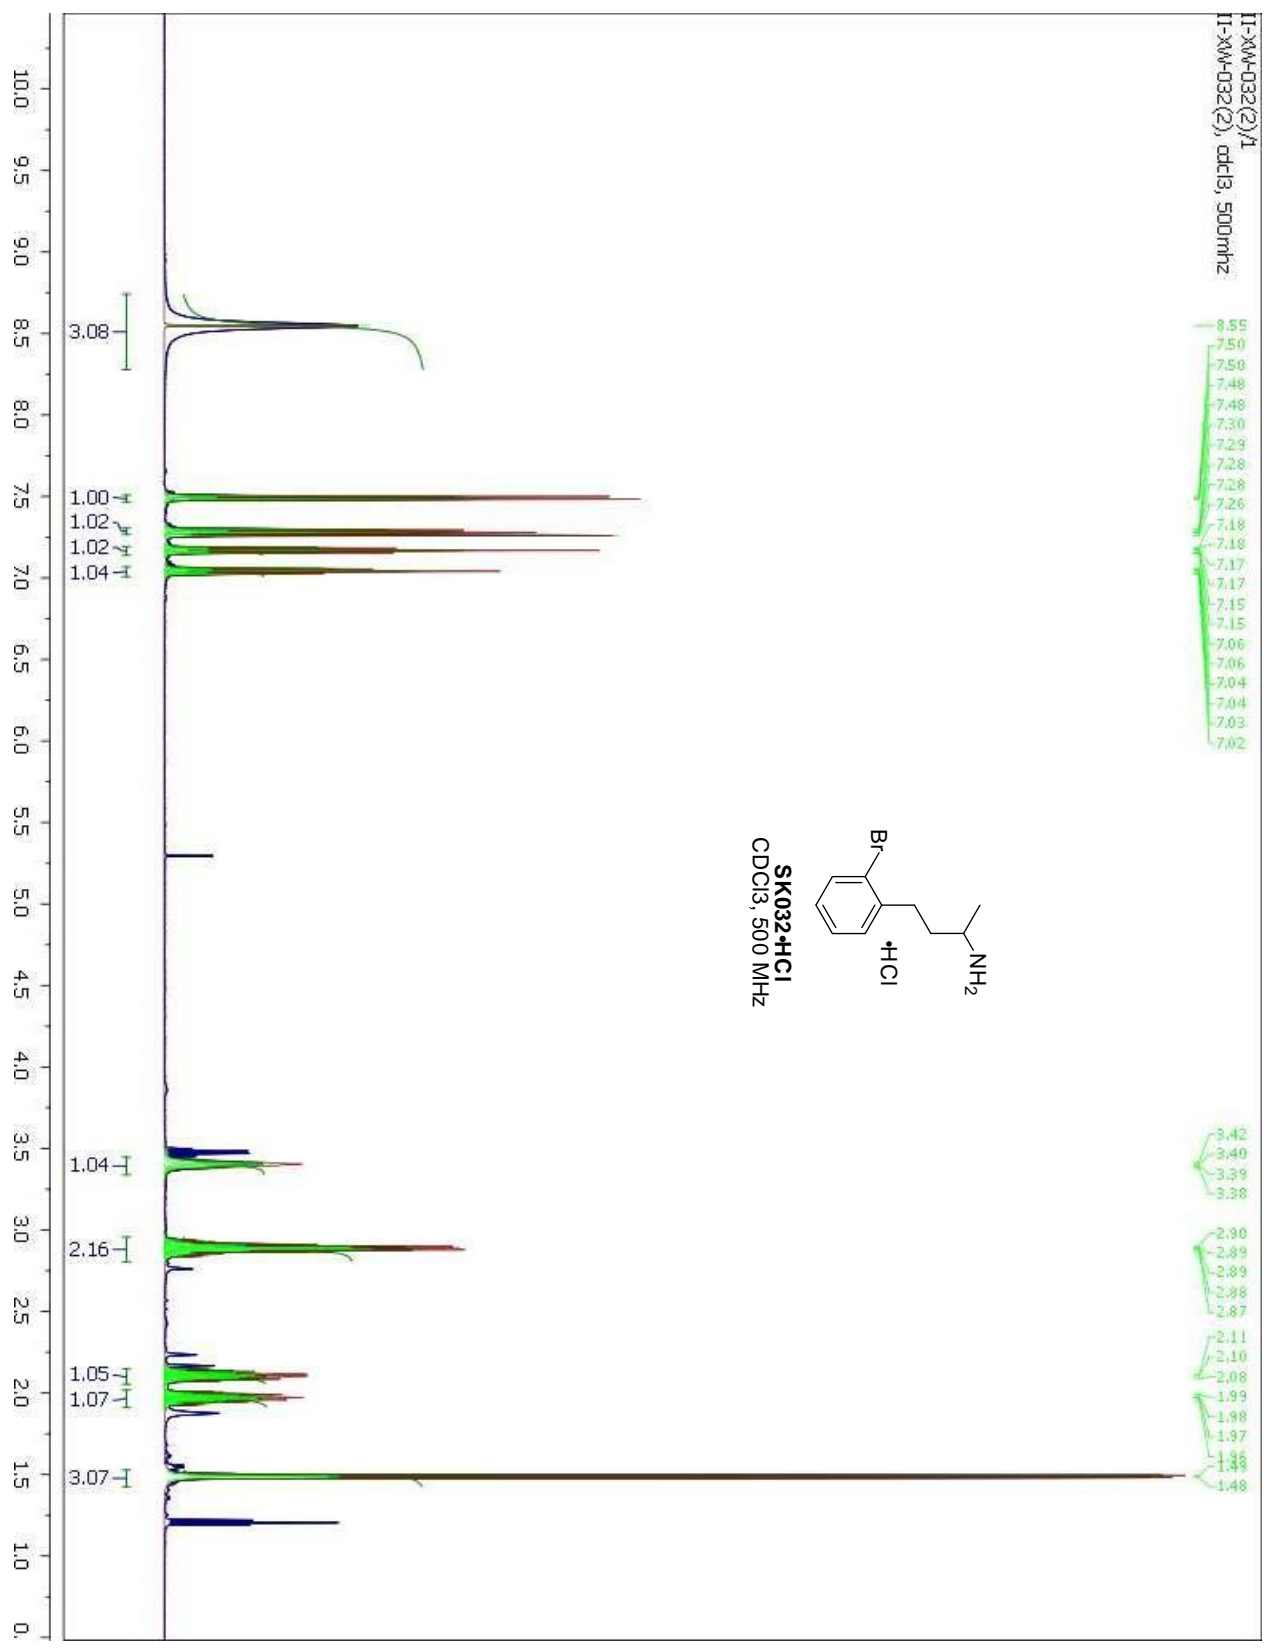

IT-XM-032(2)/2  
IT-XM-032(2), cdcl3, 125mhz

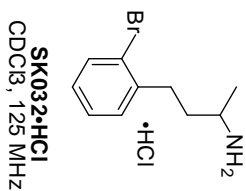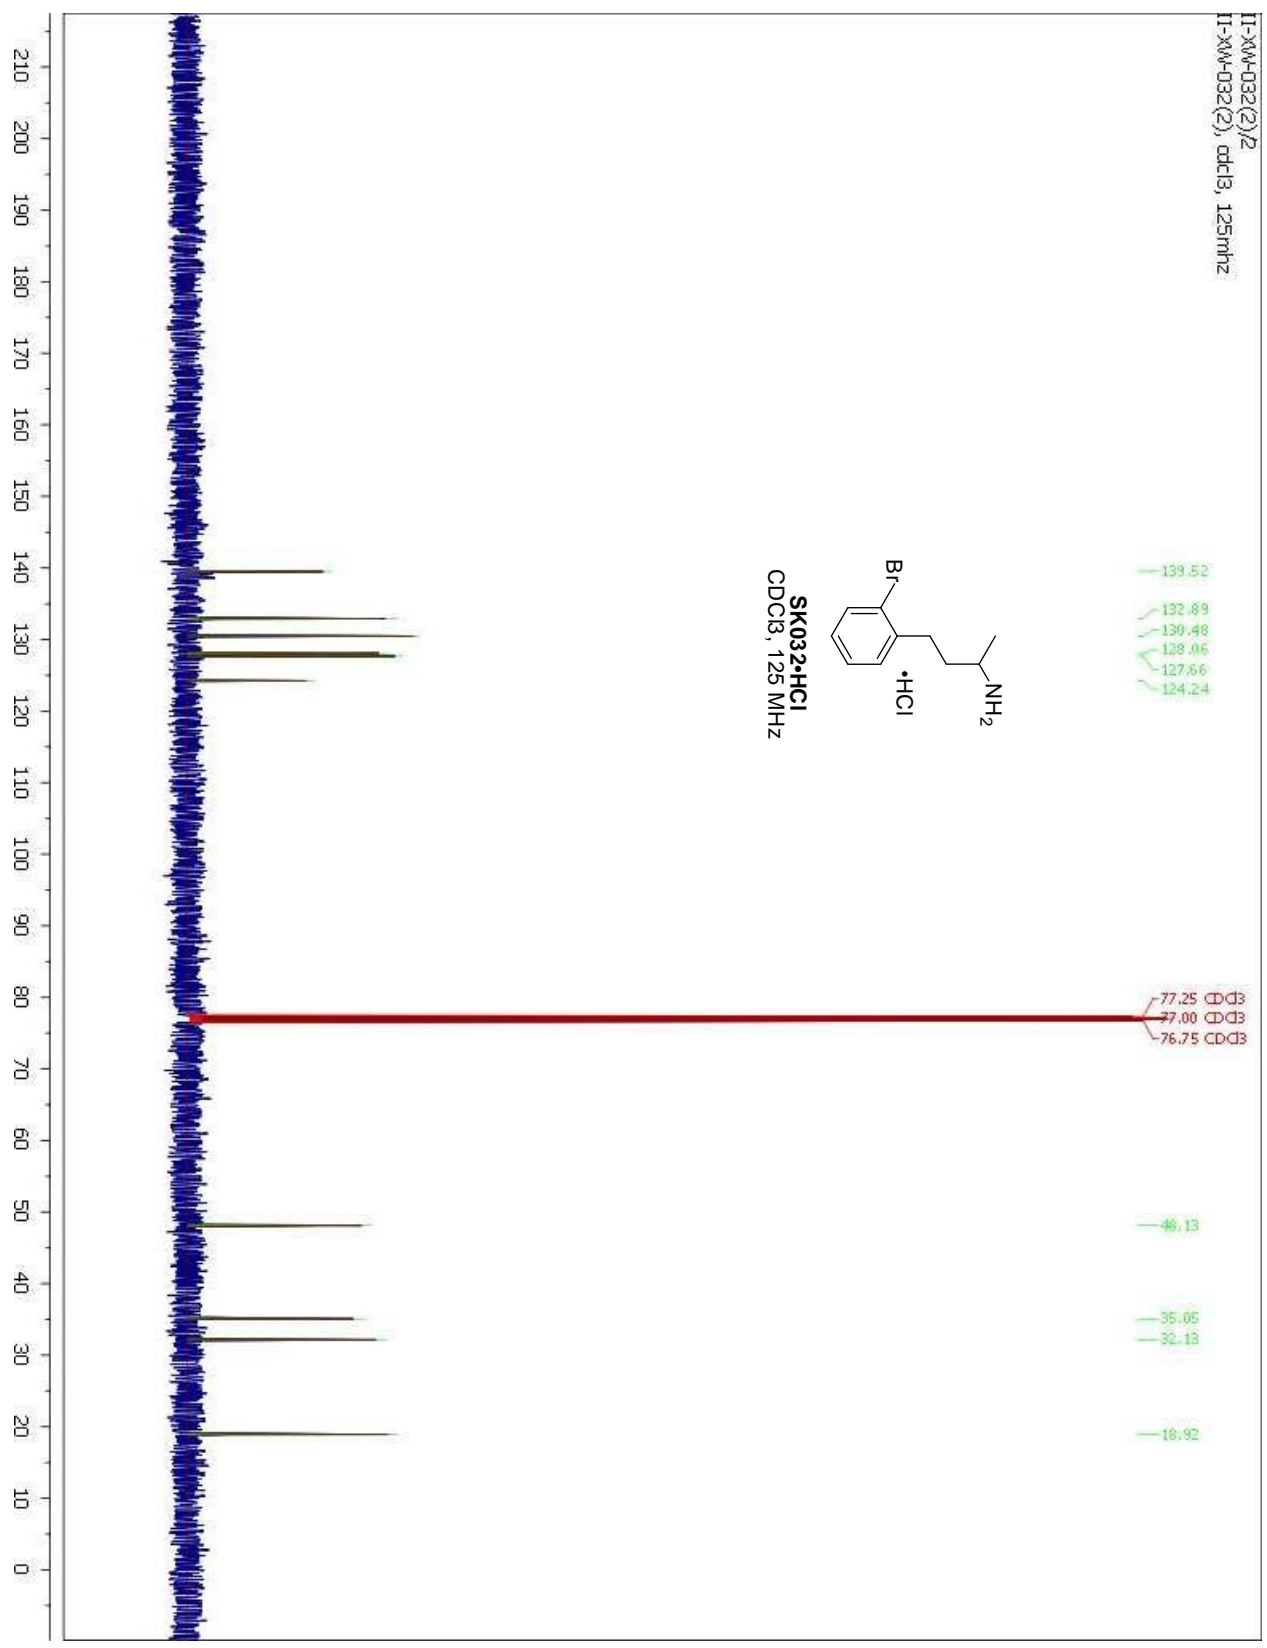



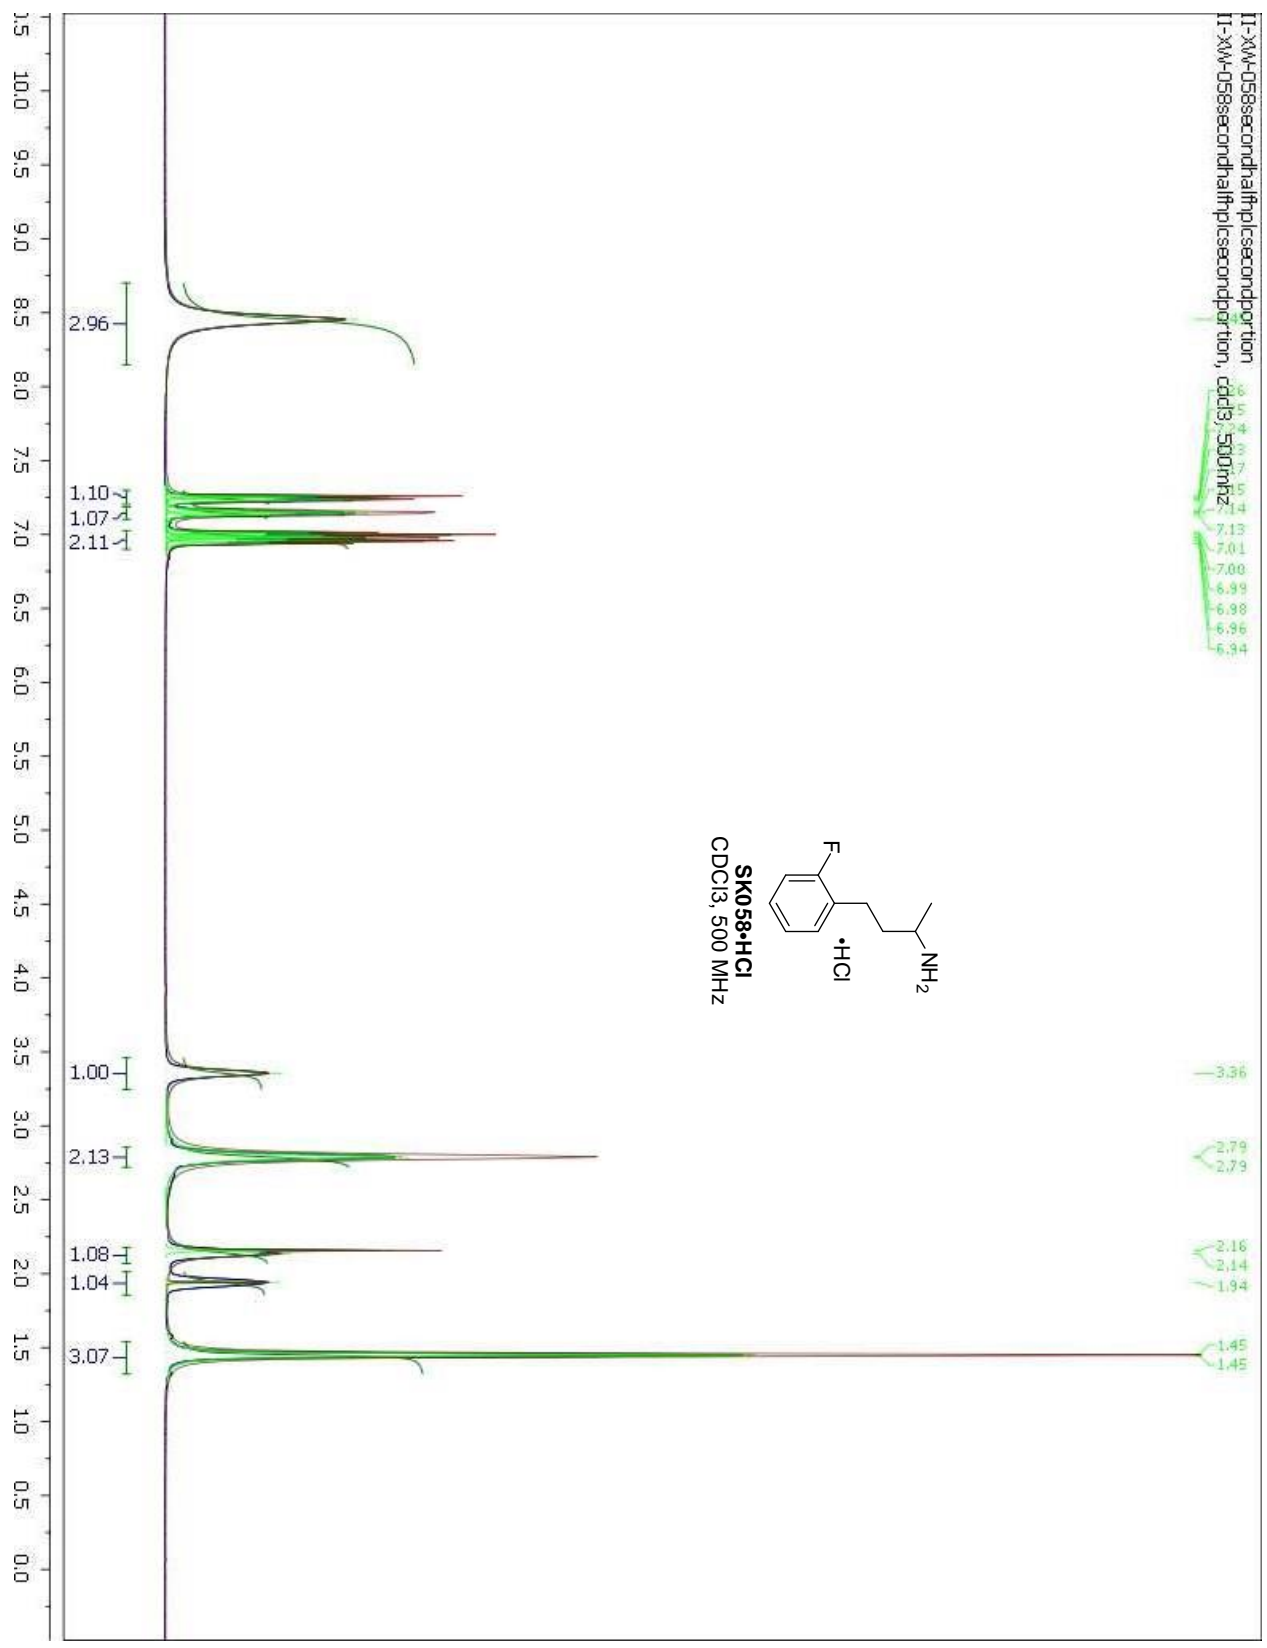

IT-XM-052/1  
IT-XM-052, cdcl3, 500mhz

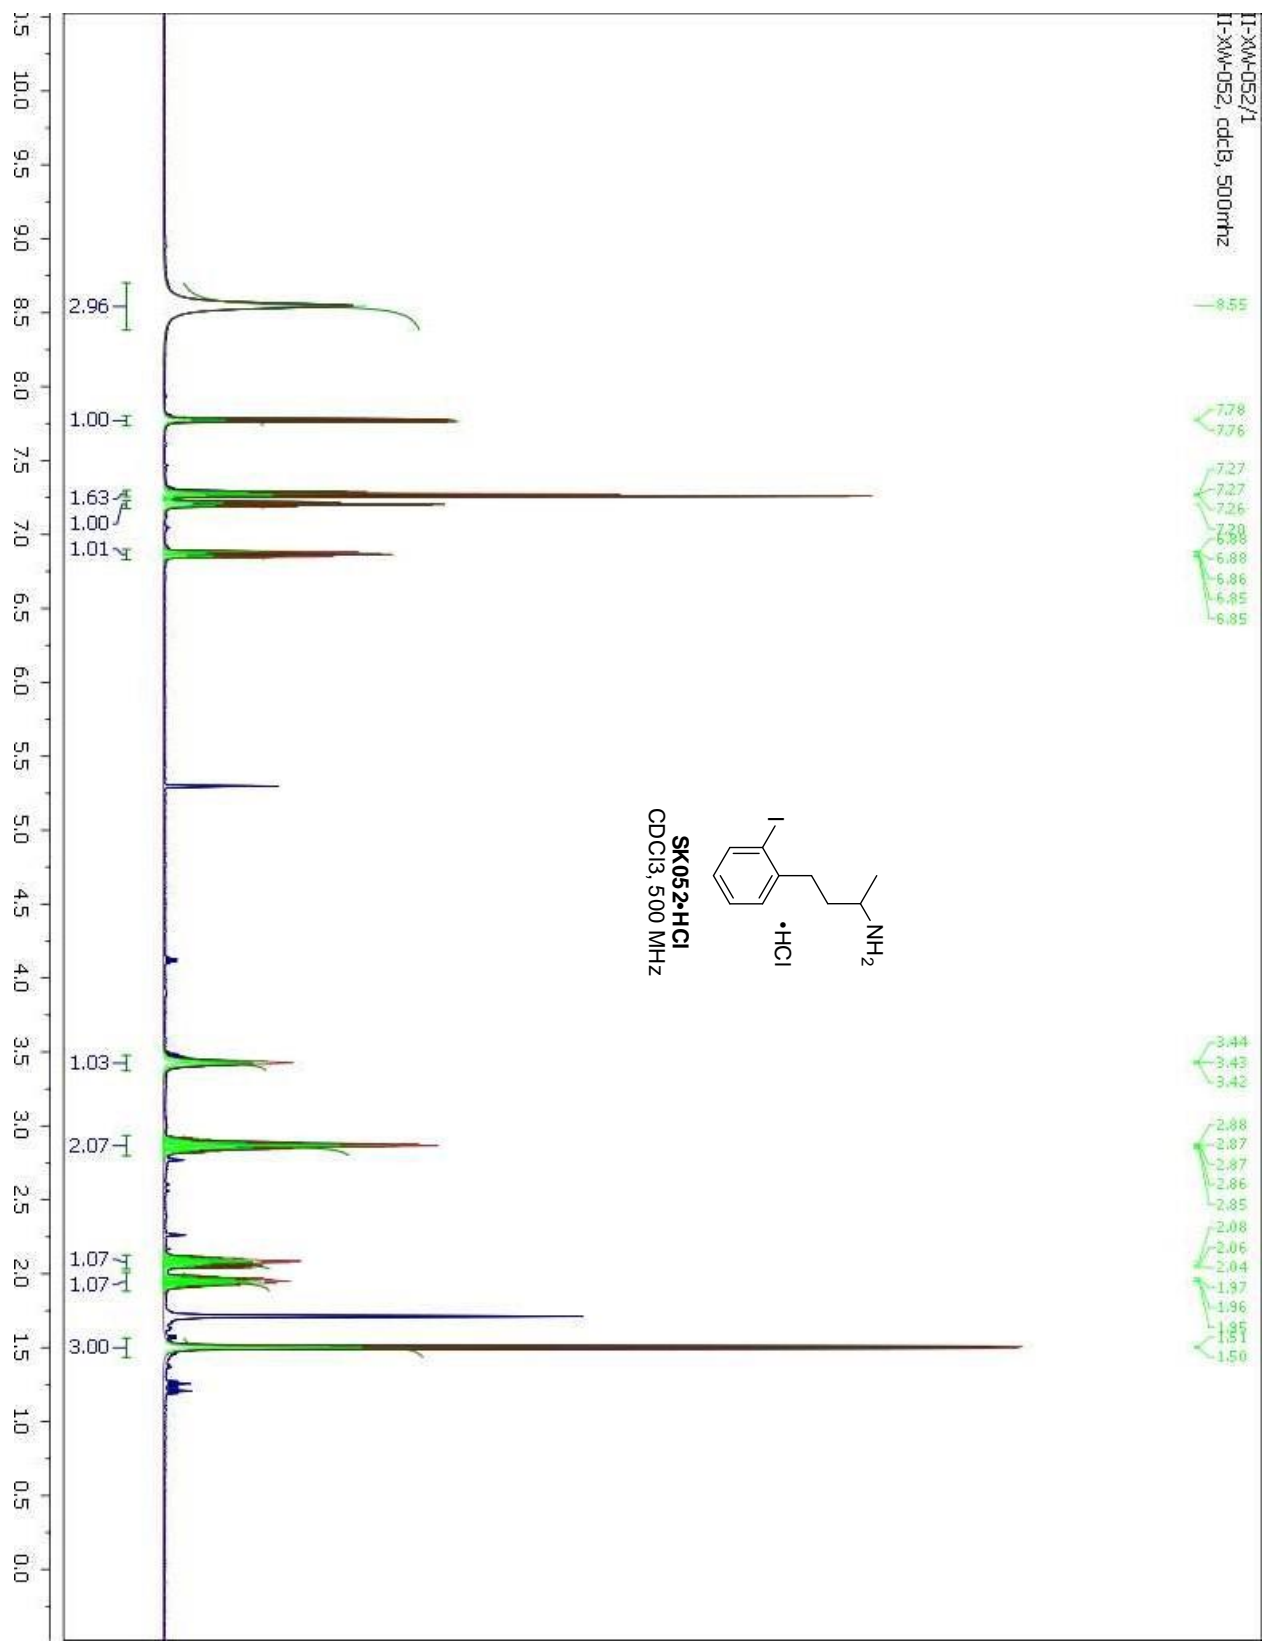

IT-XM-052/2  
IT-XM-052, cdcl3, 125mhz

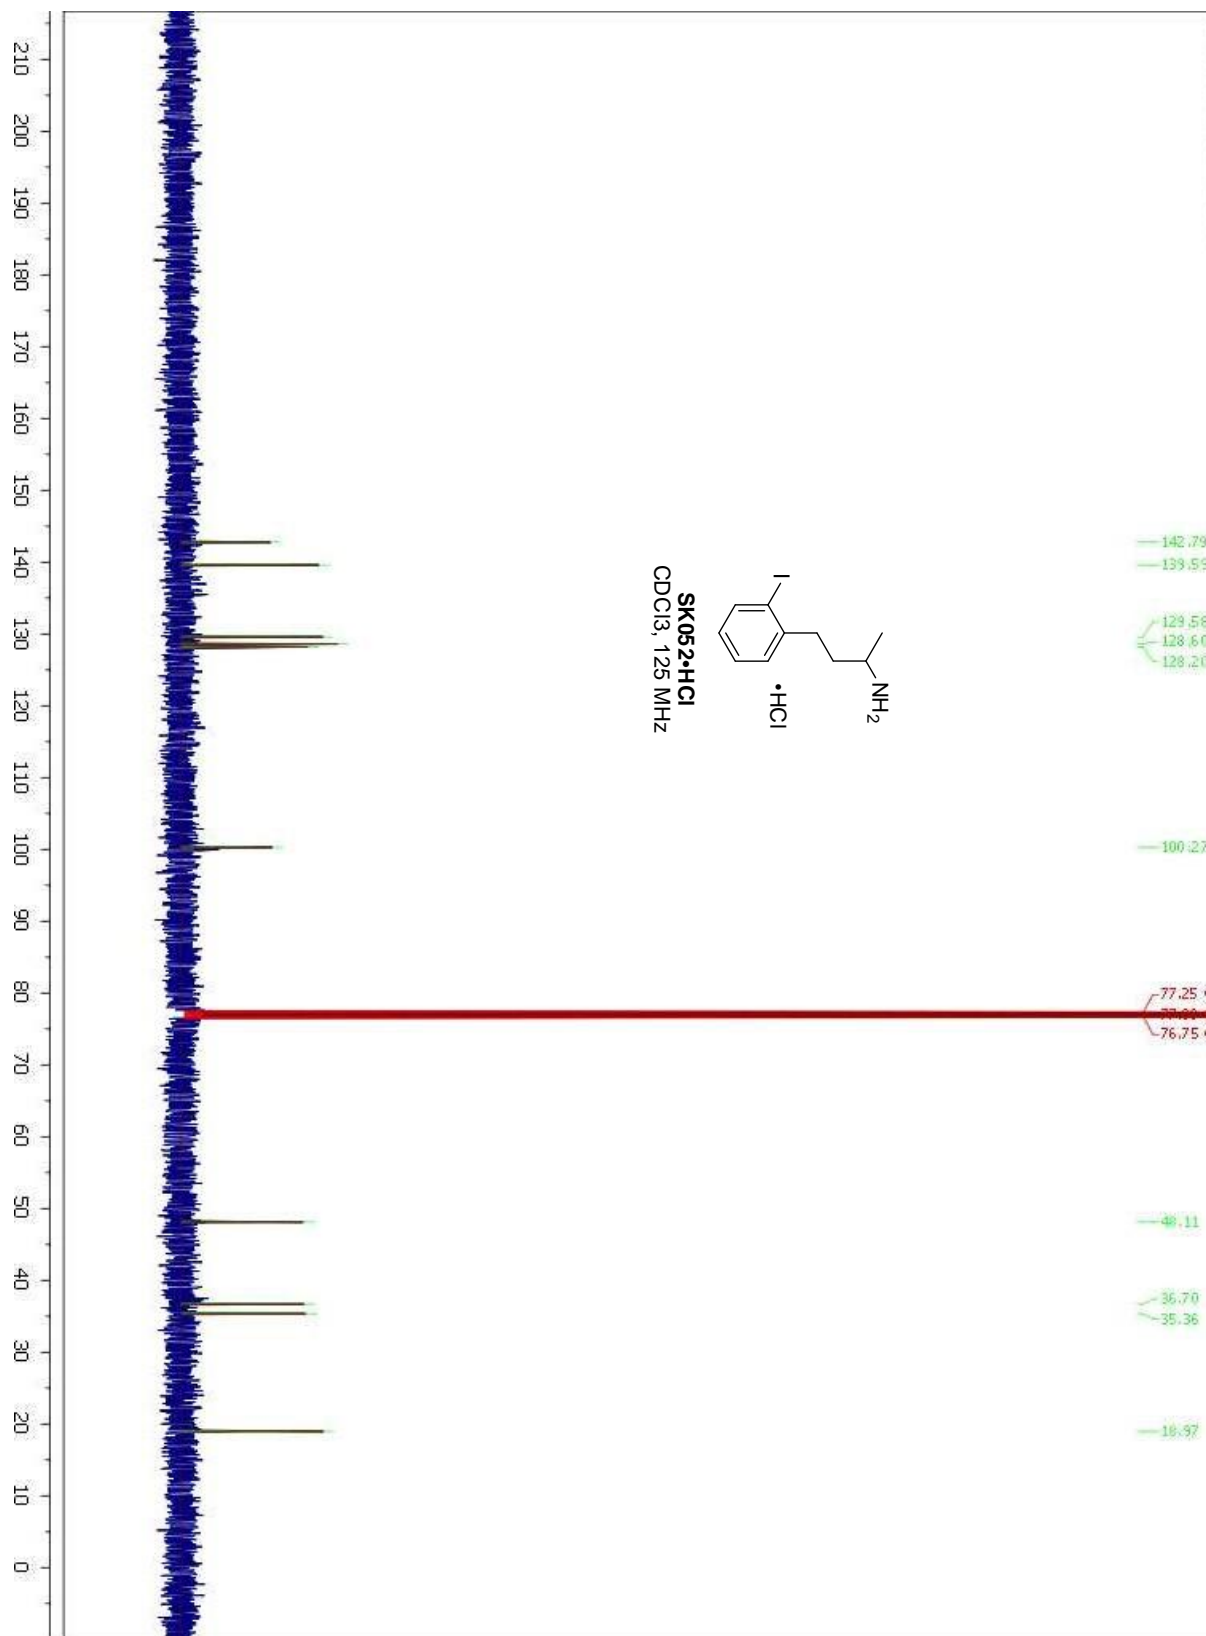

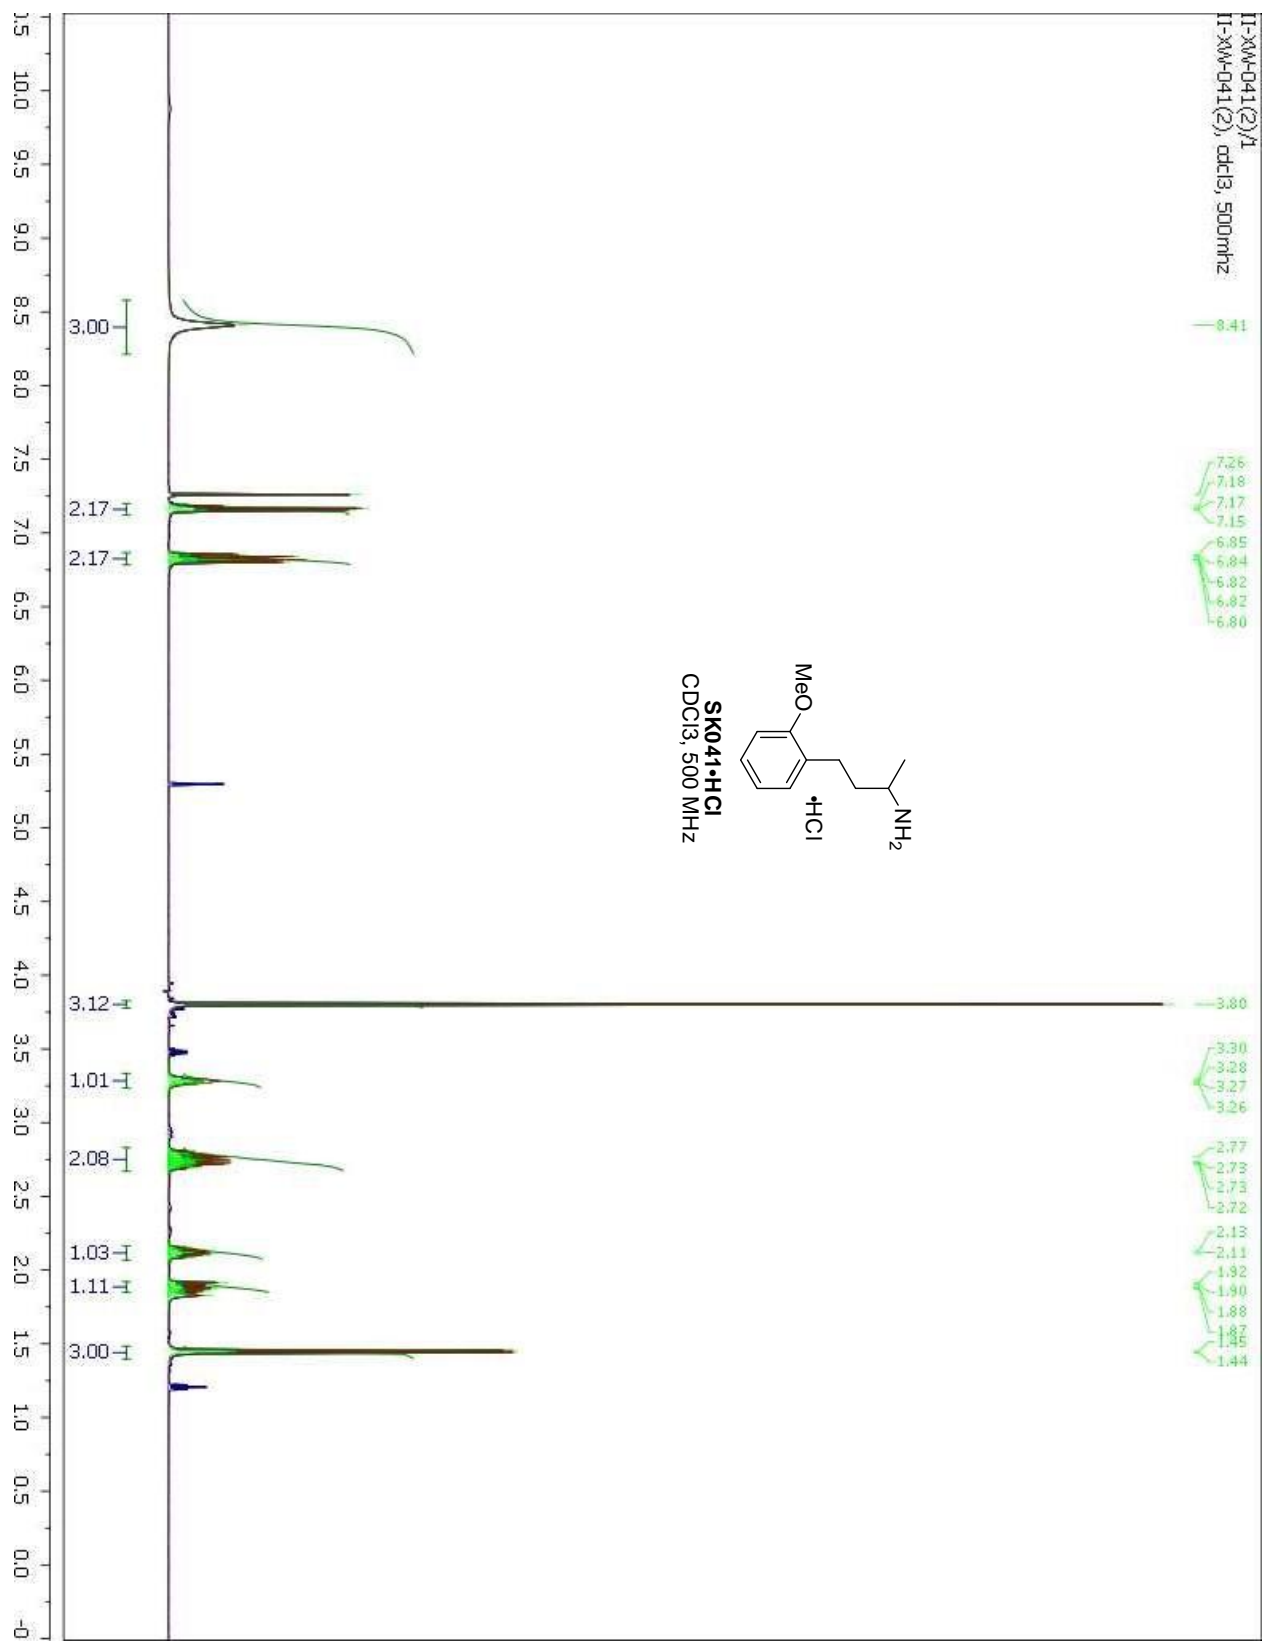

IT-XM-041/2  
IT-XM-041, cdcl3, 125mhz

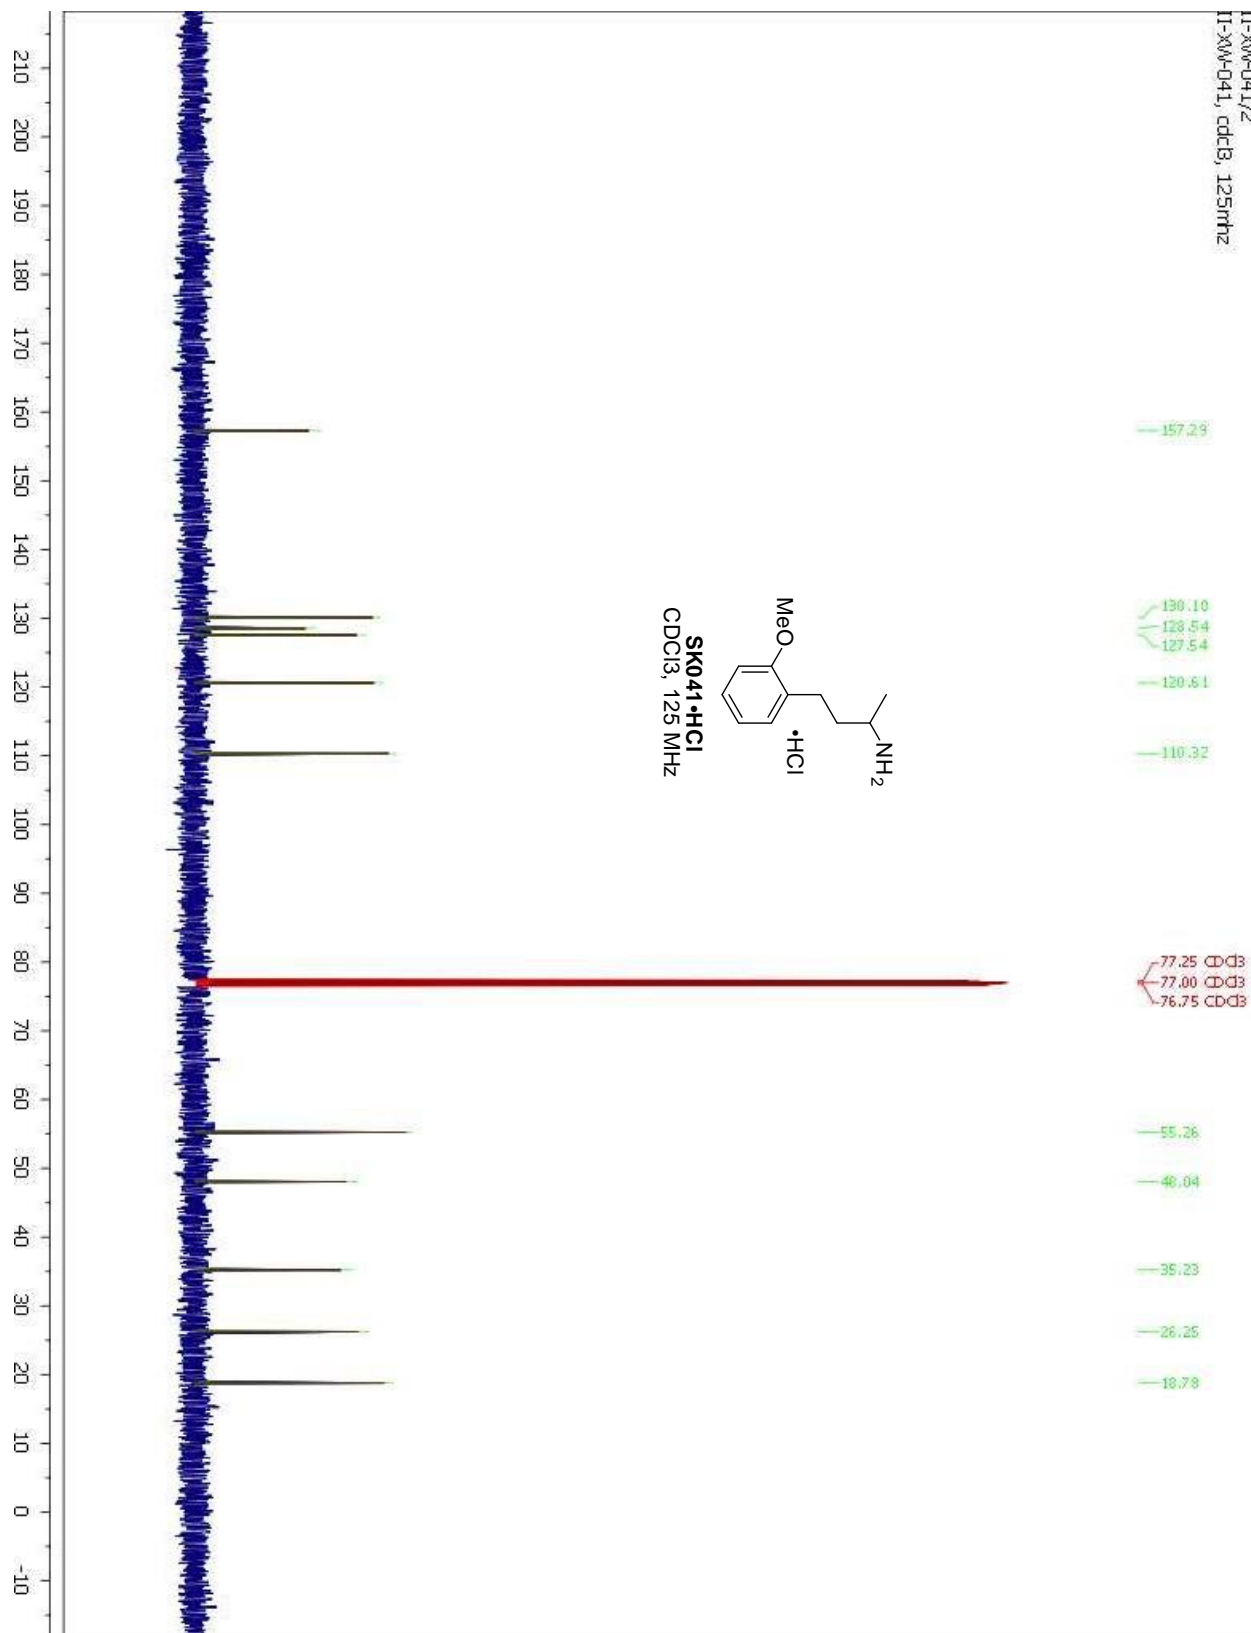

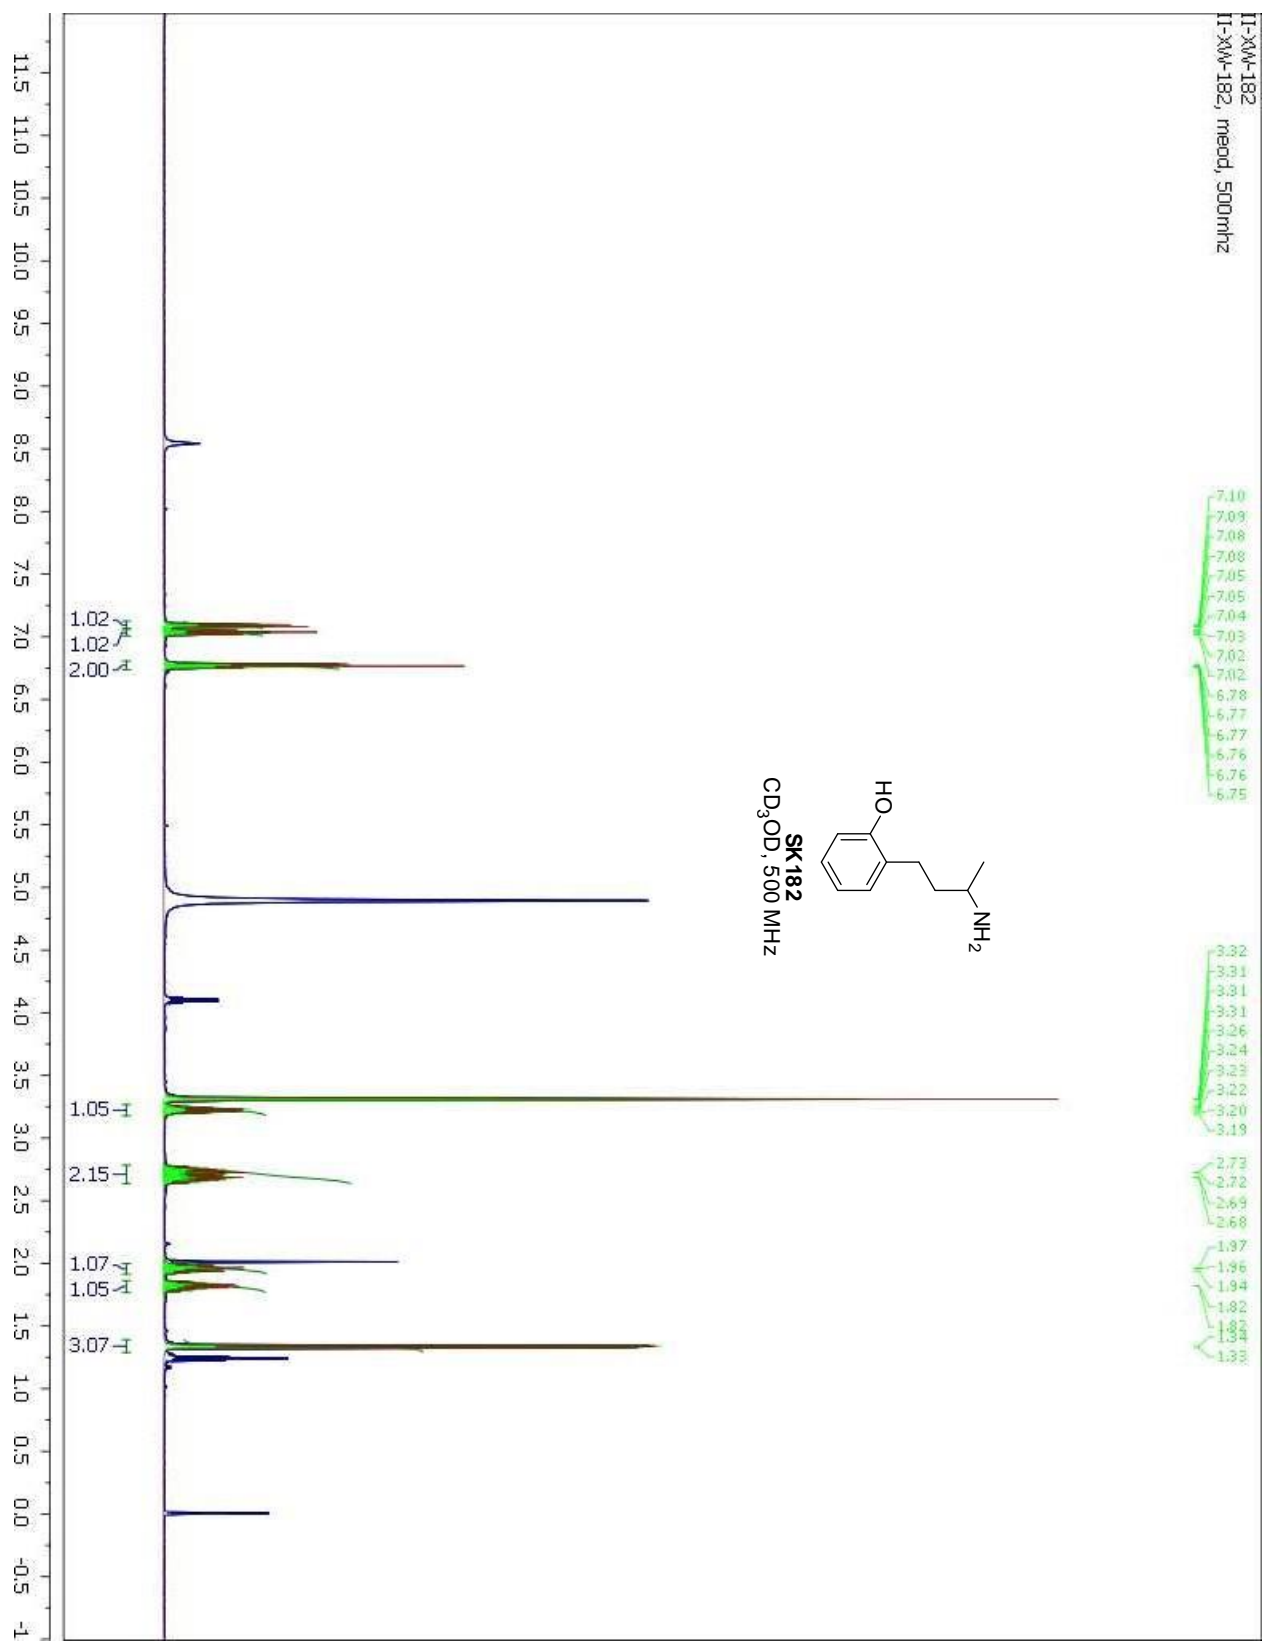

IT-XM-182  
IT-XM-182, meod, 125mhz

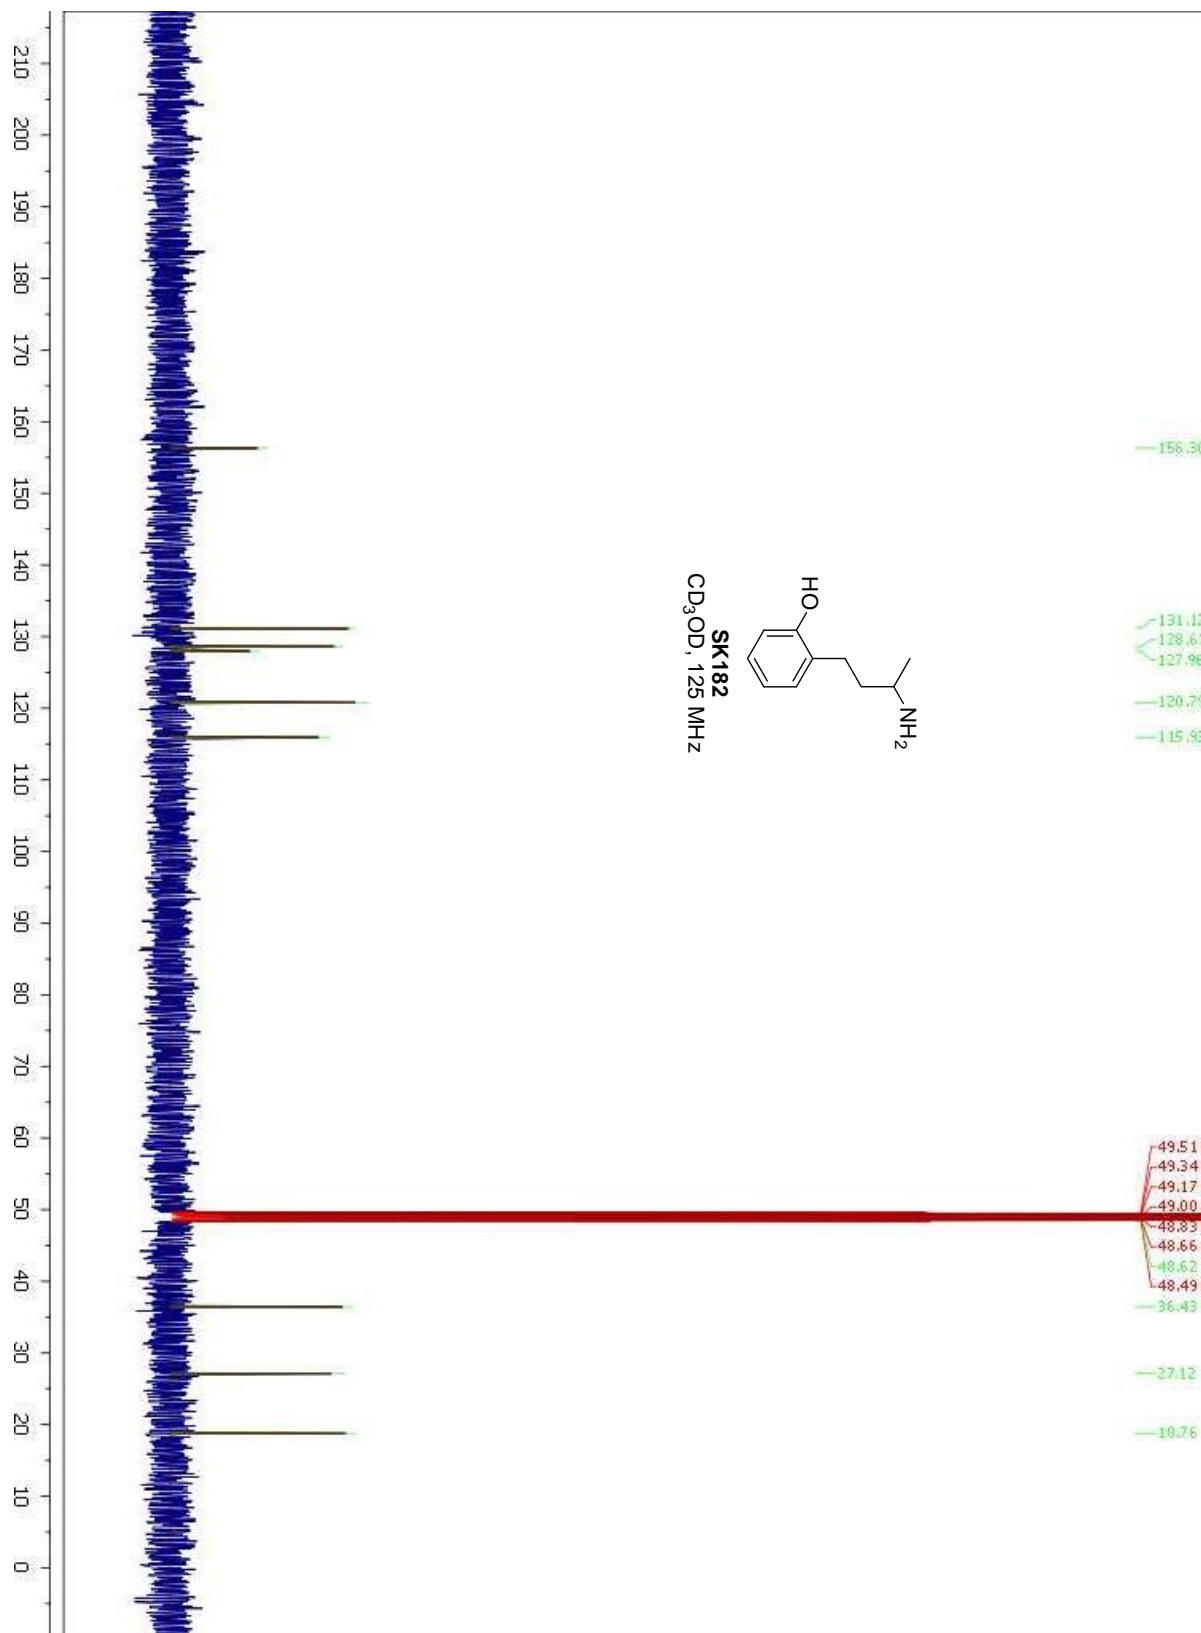

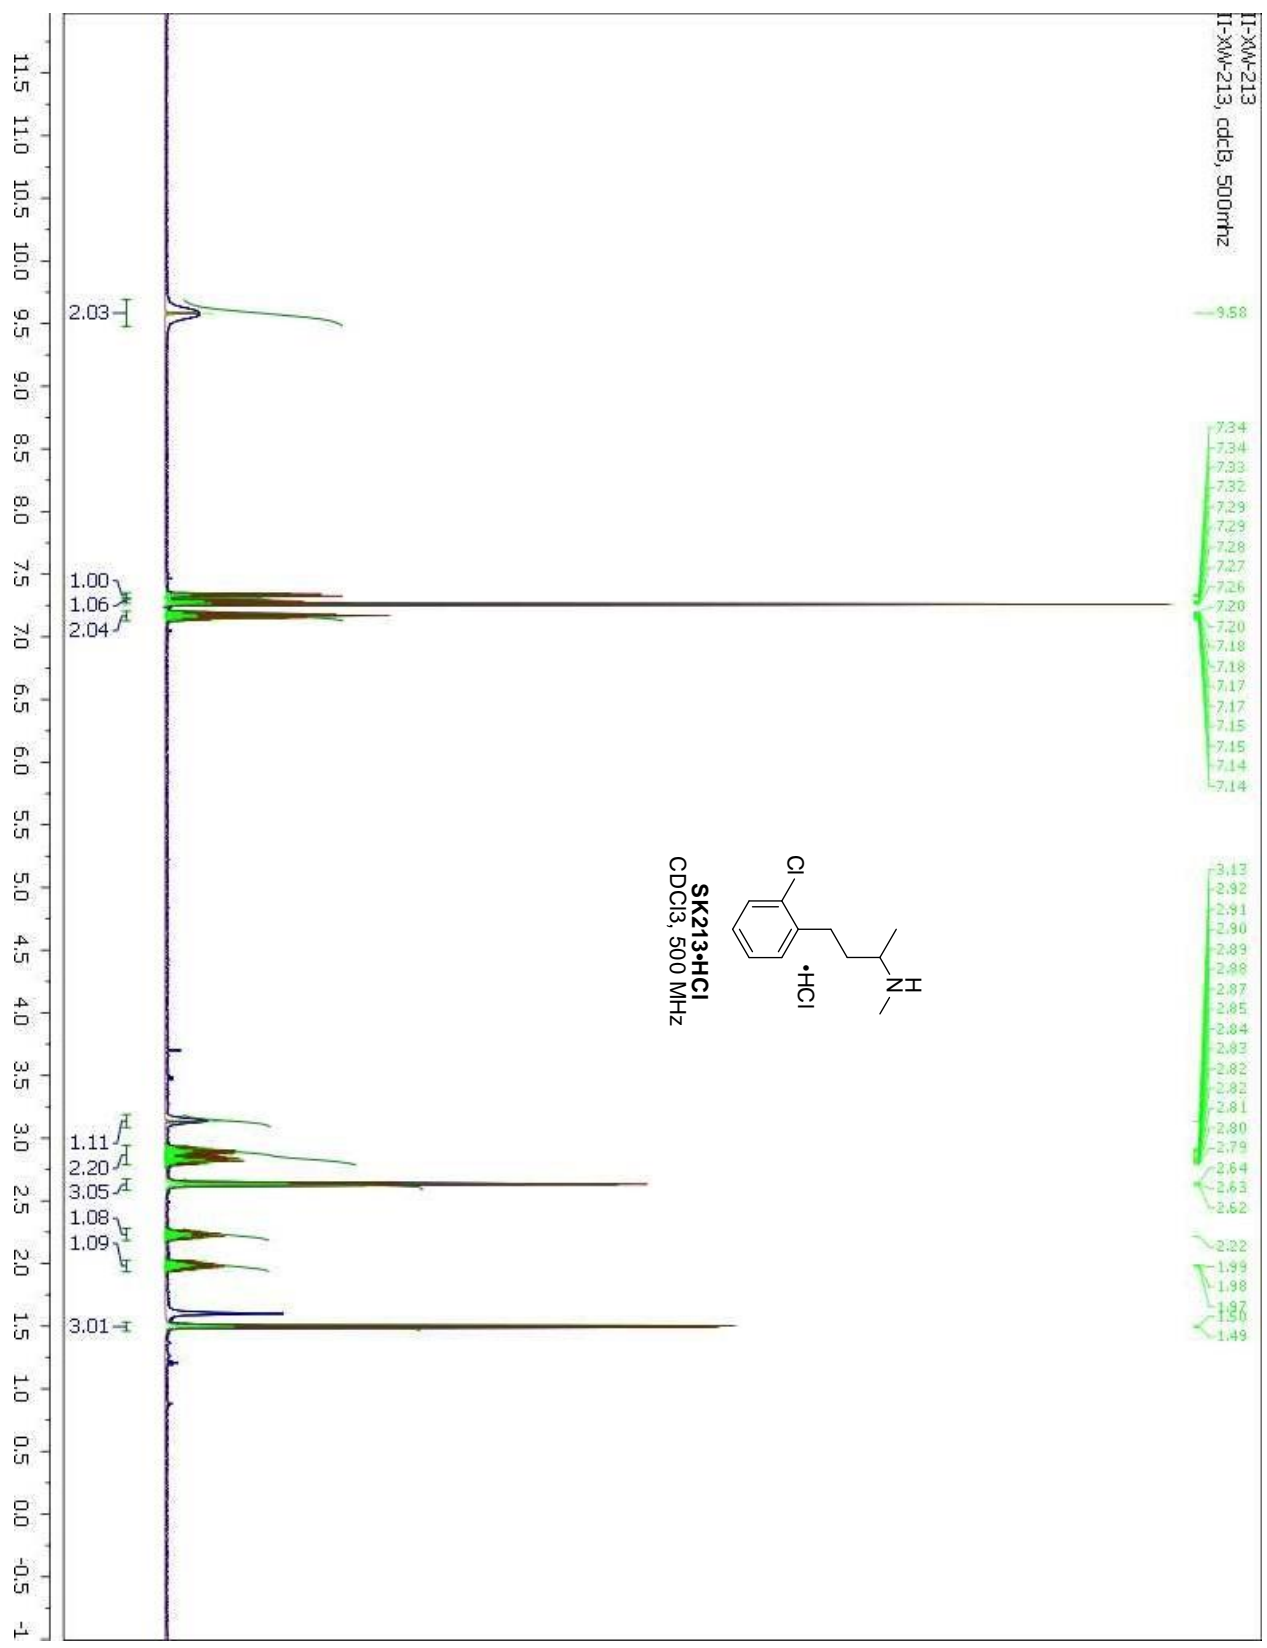



IT-XM-206  
IT-XM-206, cdcl3, 125mhz

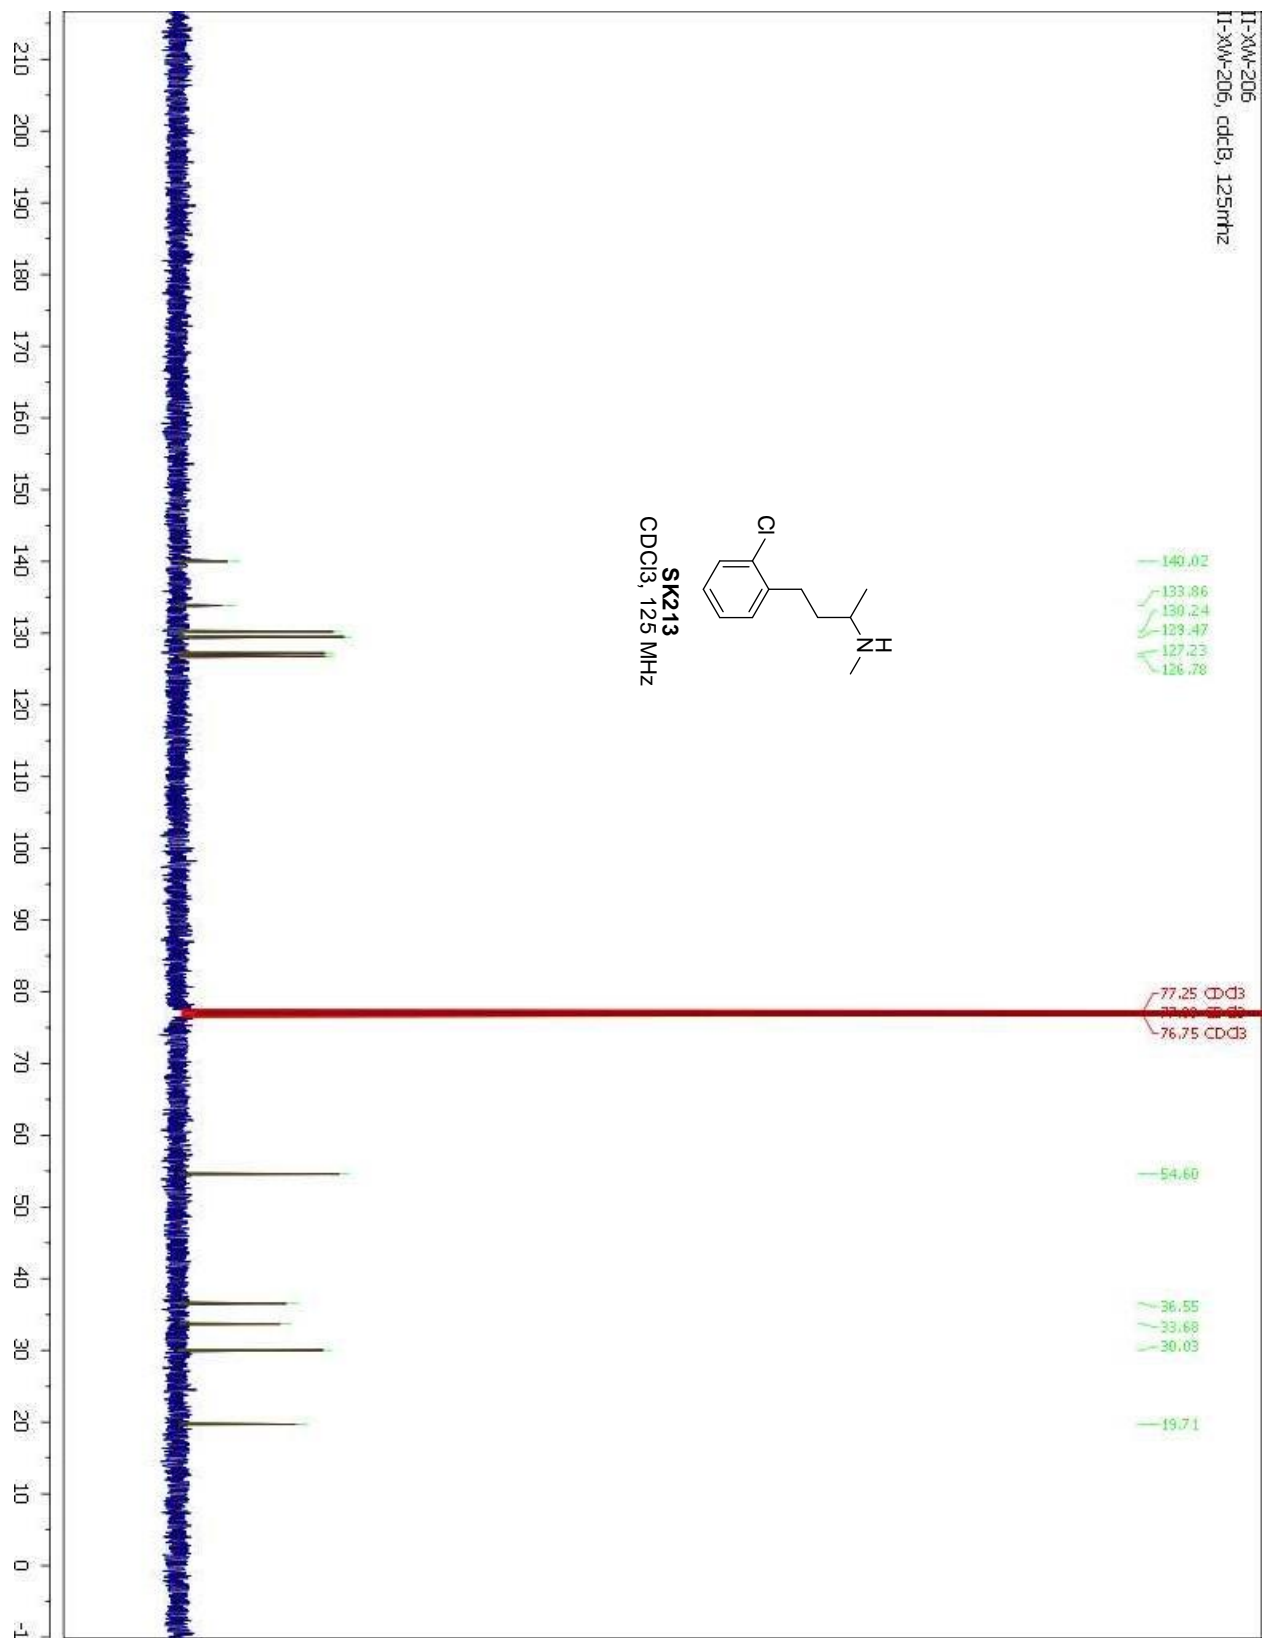

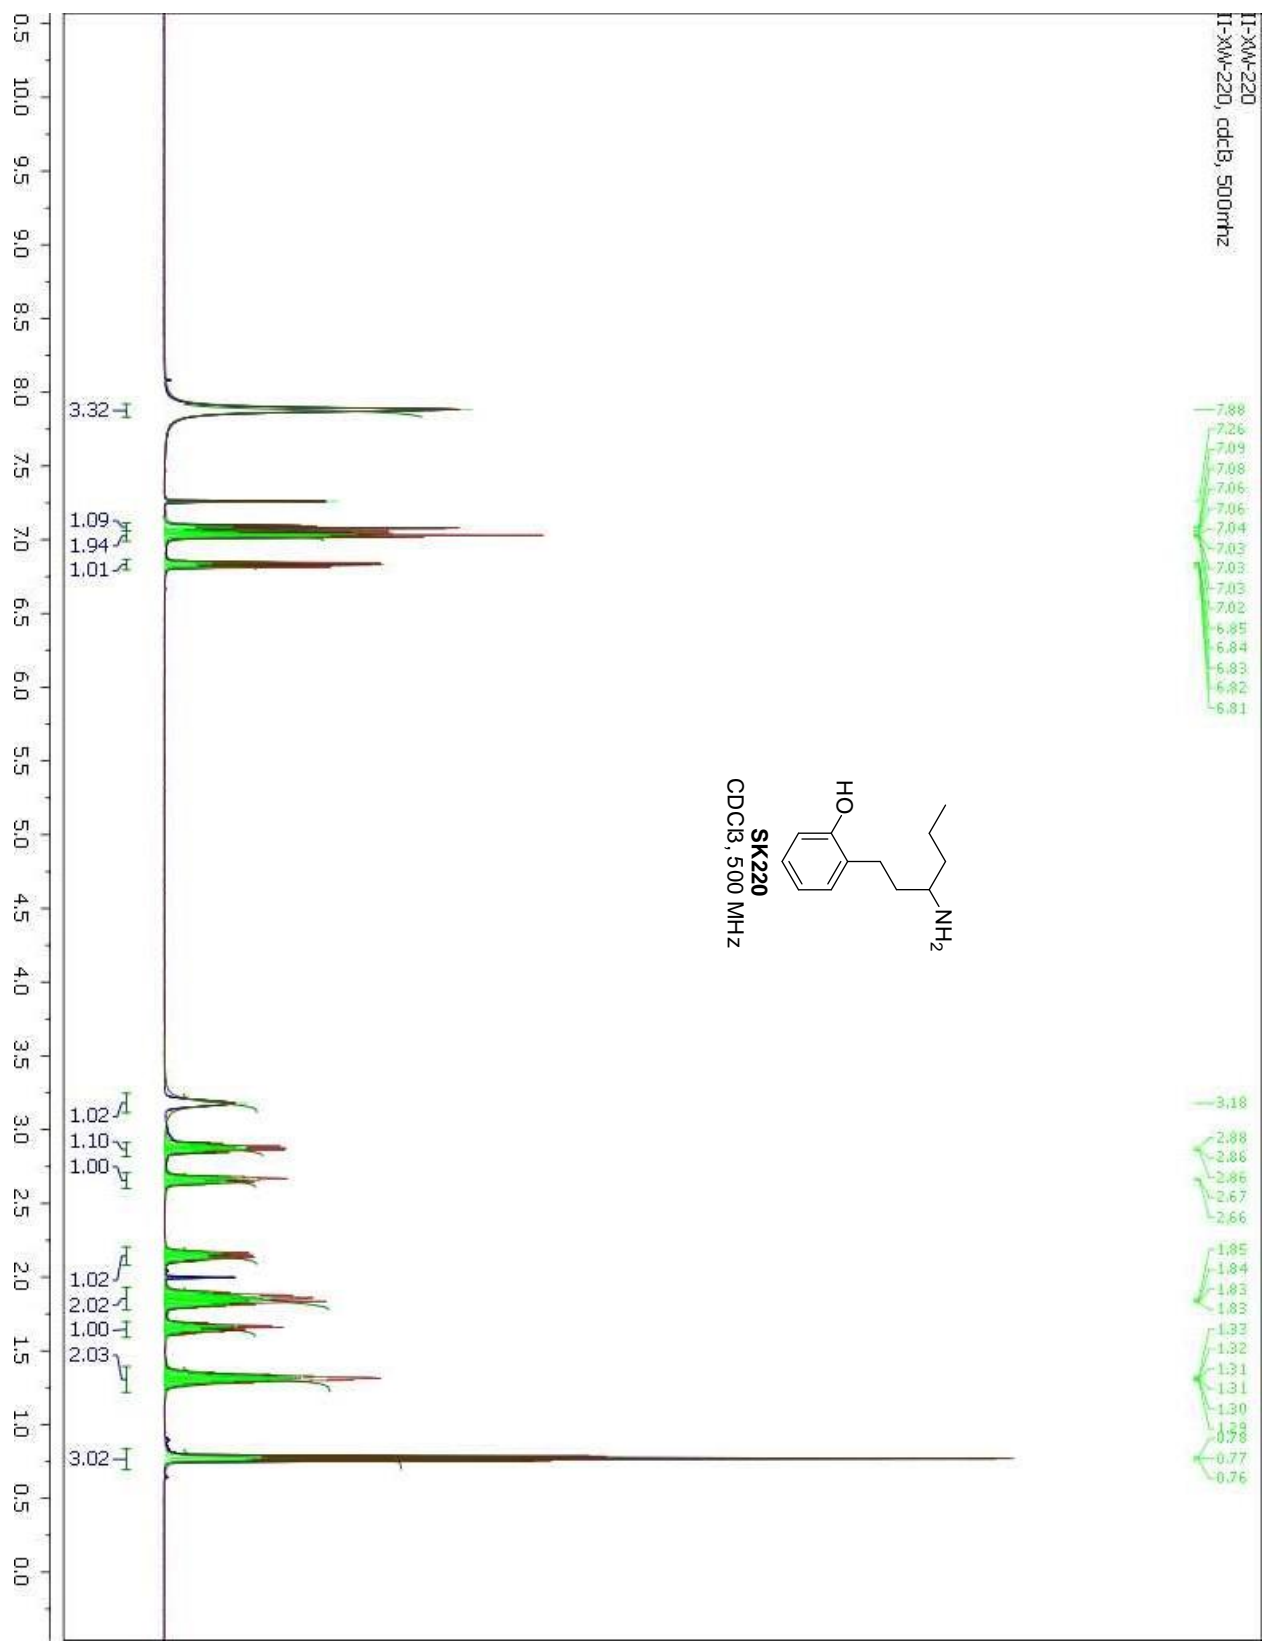

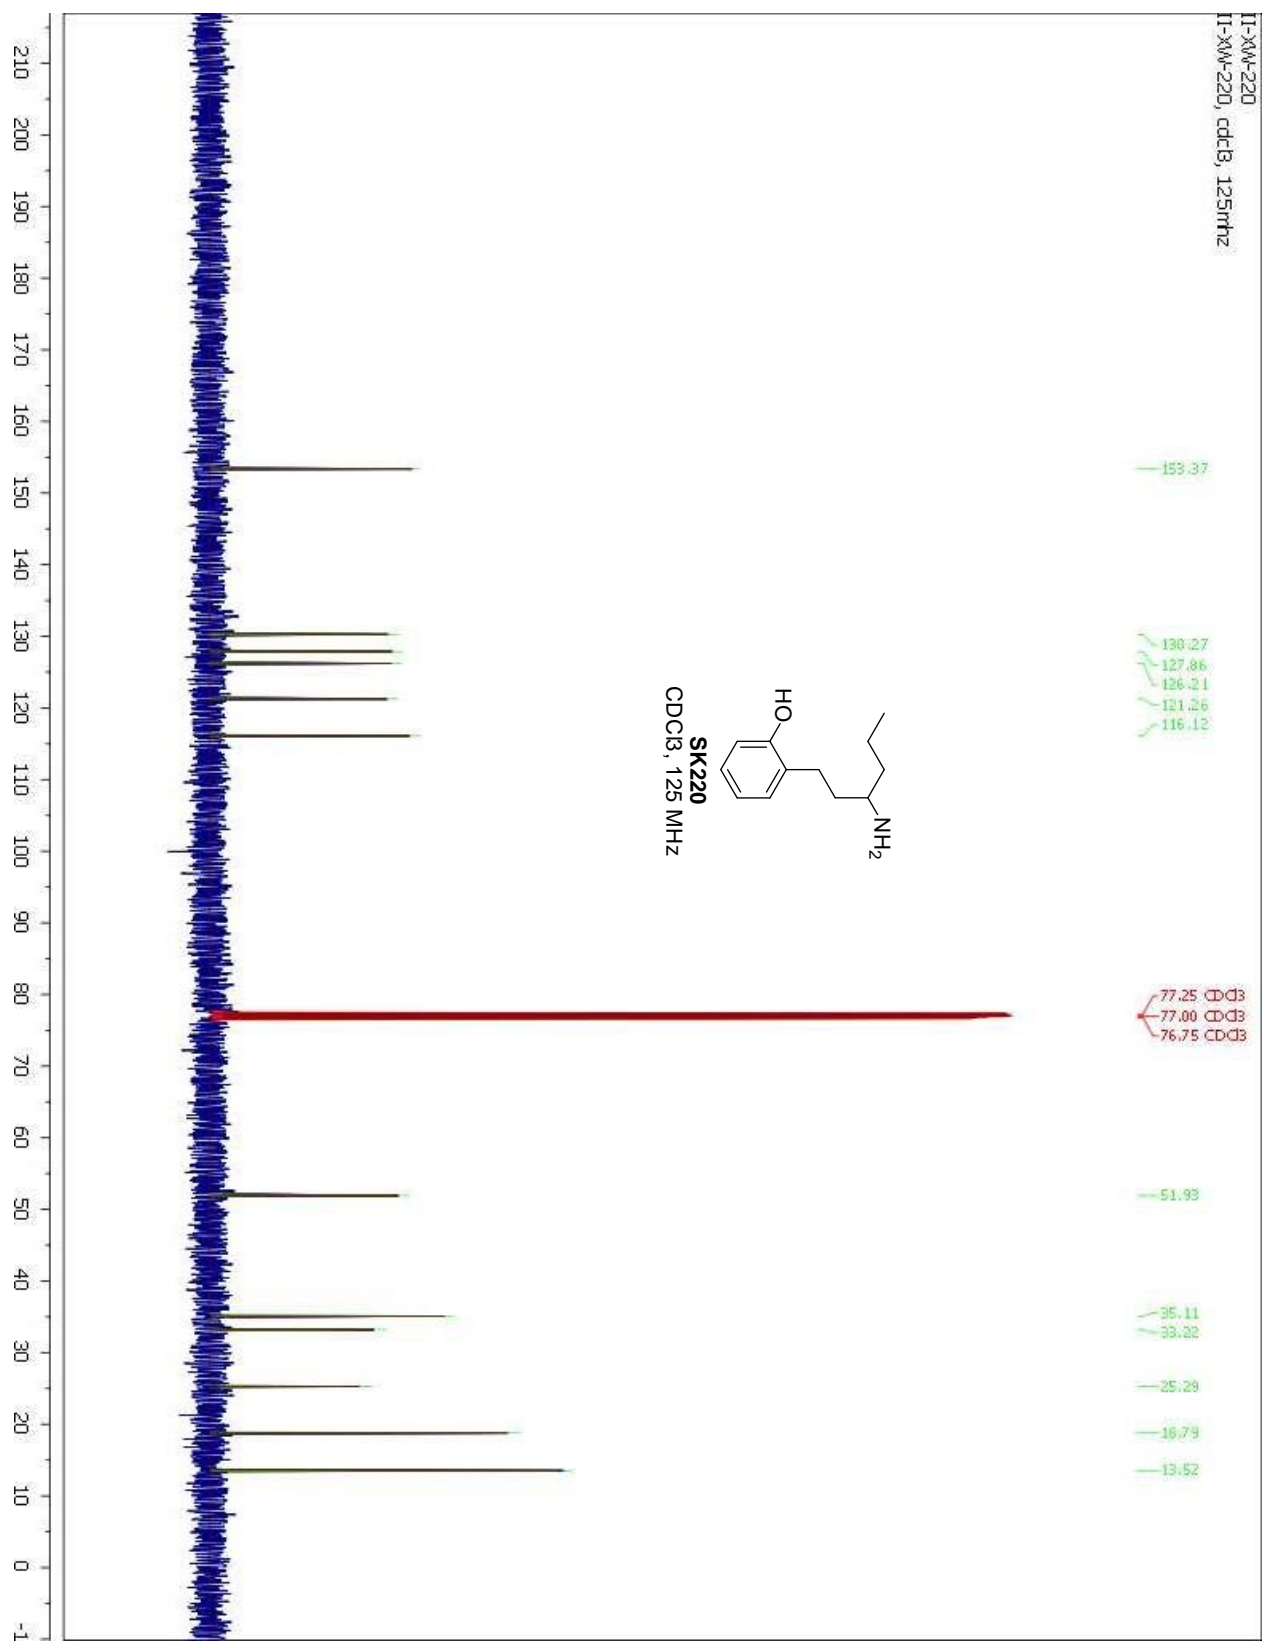

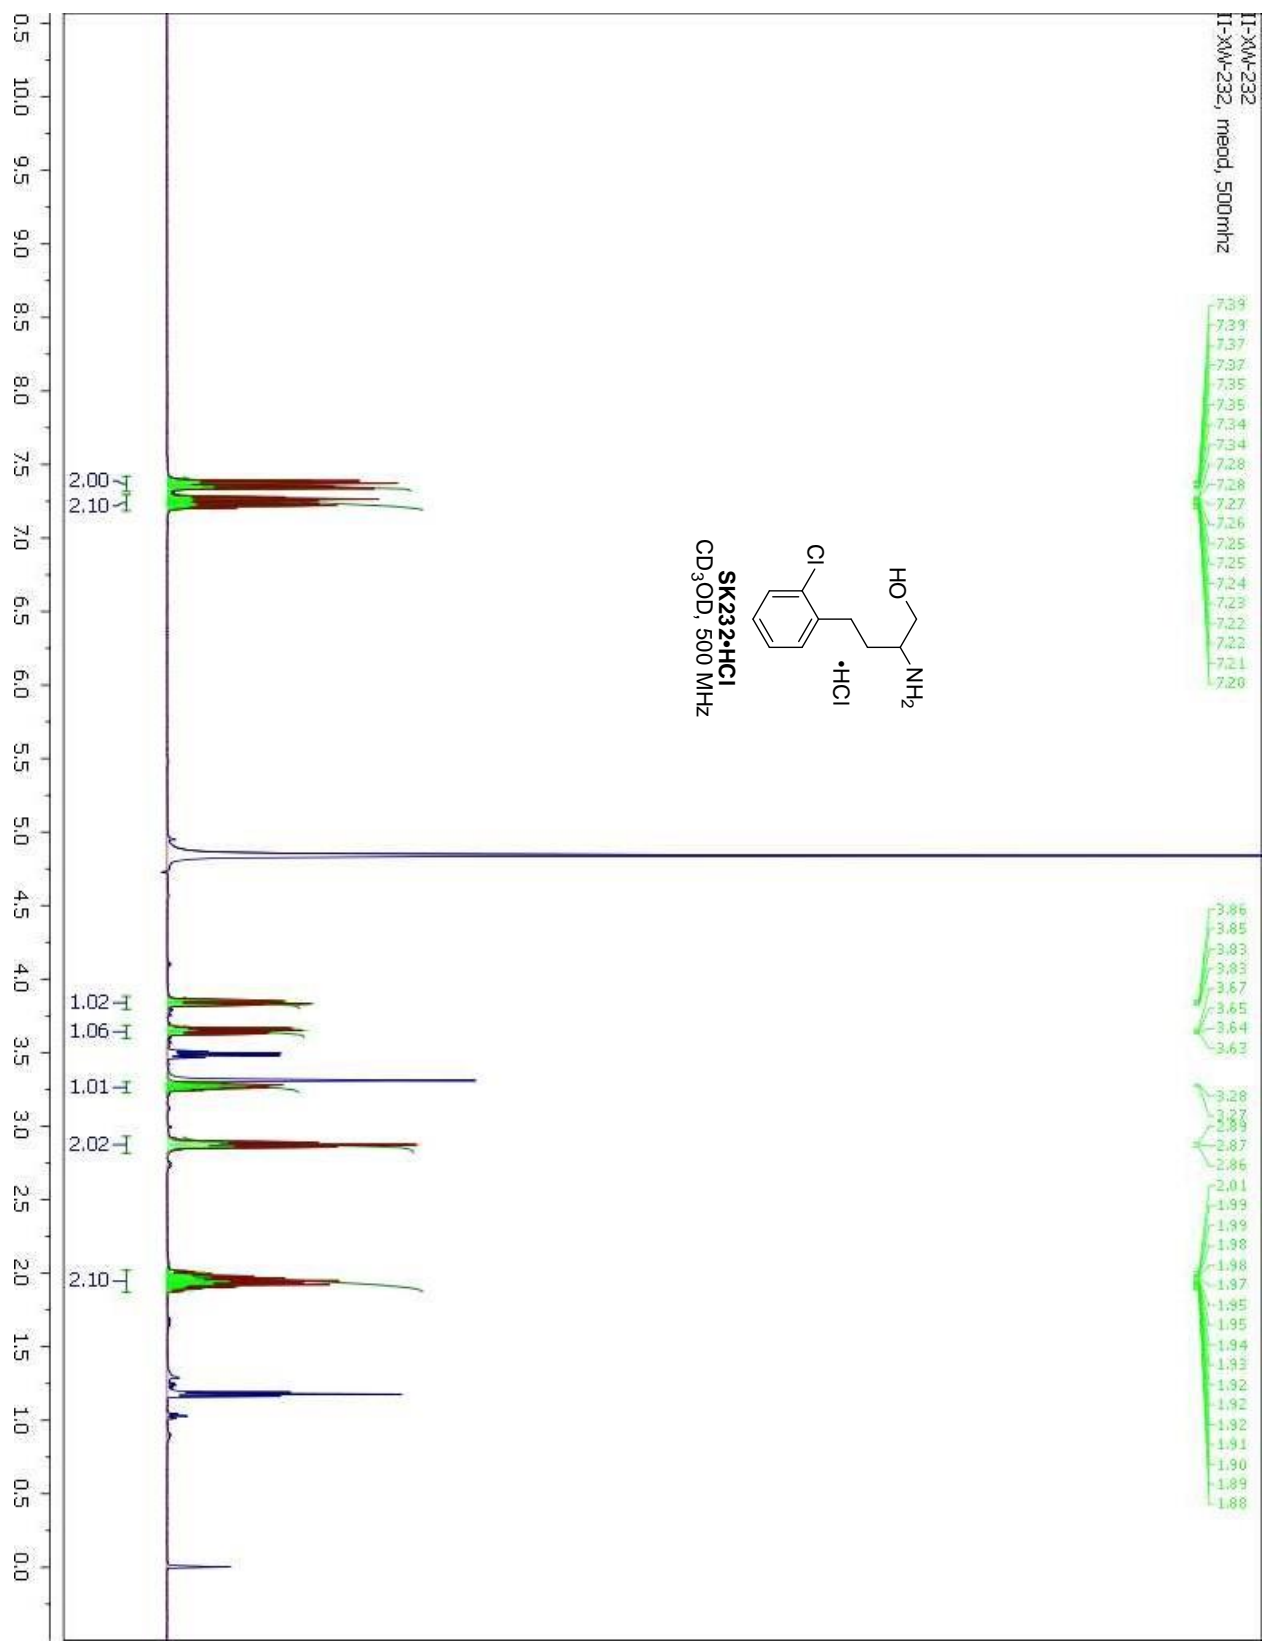

IT-XM-232  
IT-XM-232, meod, 125mhz

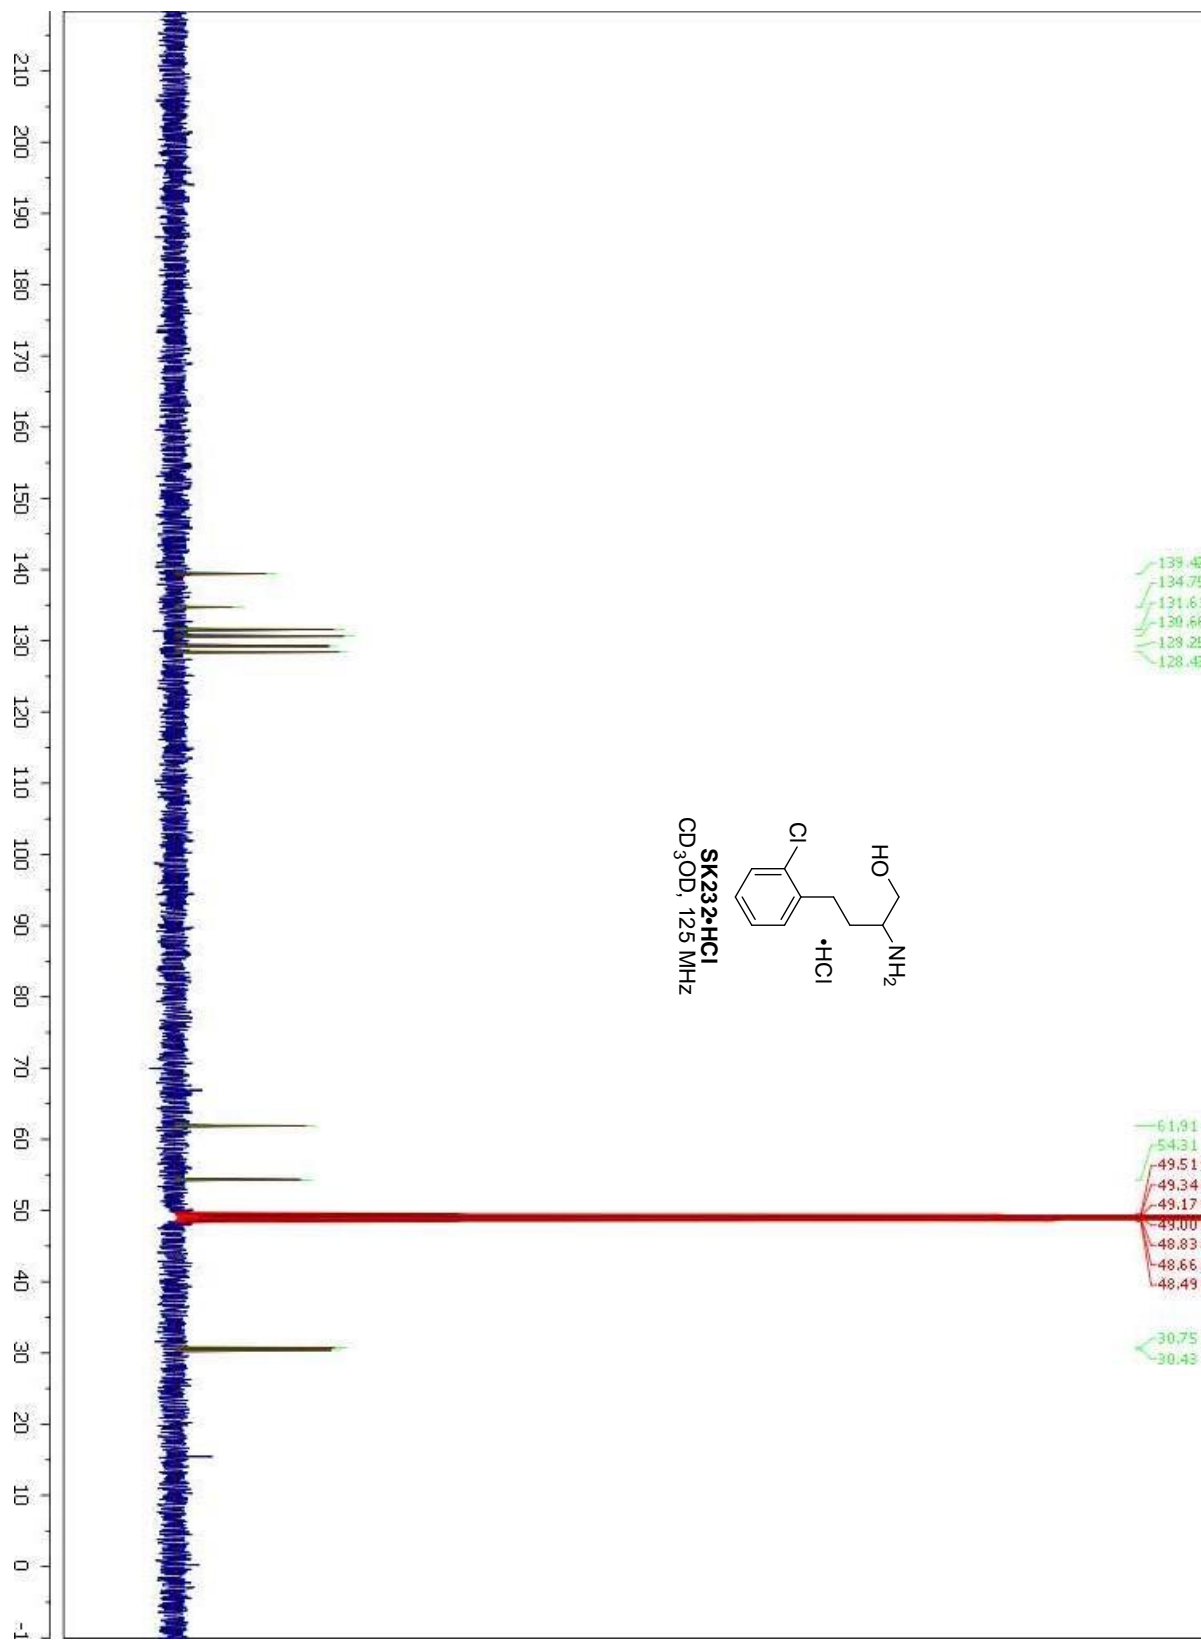

III-XW-022  
III-XW-022, cdd3, 500mhz

8.54  
7.31  
7.30  
7.29  
7.28  
7.27  
7.26  
7.14  
7.13  
7.12  
7.12  
3.39  
3.38  
2.91  
2.89  
2.88  
2.86  
2.84  
2.10  
2.09  
1.97  
1.96  
1.95  
1.88  
1.88  
1.47

2.98  
2.03  
2.01  
1.00  
2.01  
1.03  
1.08  
3.01

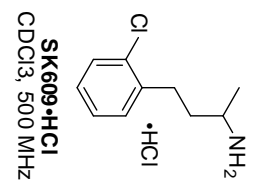

III-XM-022  
III-XM-022, cdd3, 125mhz

137.78  
133.77  
130.49  
129.57  
127.82  
126.99

77.25 CD3  
77.00 CD3  
76.75 CD3

48.13

34.91

29.61

18.91

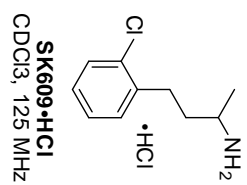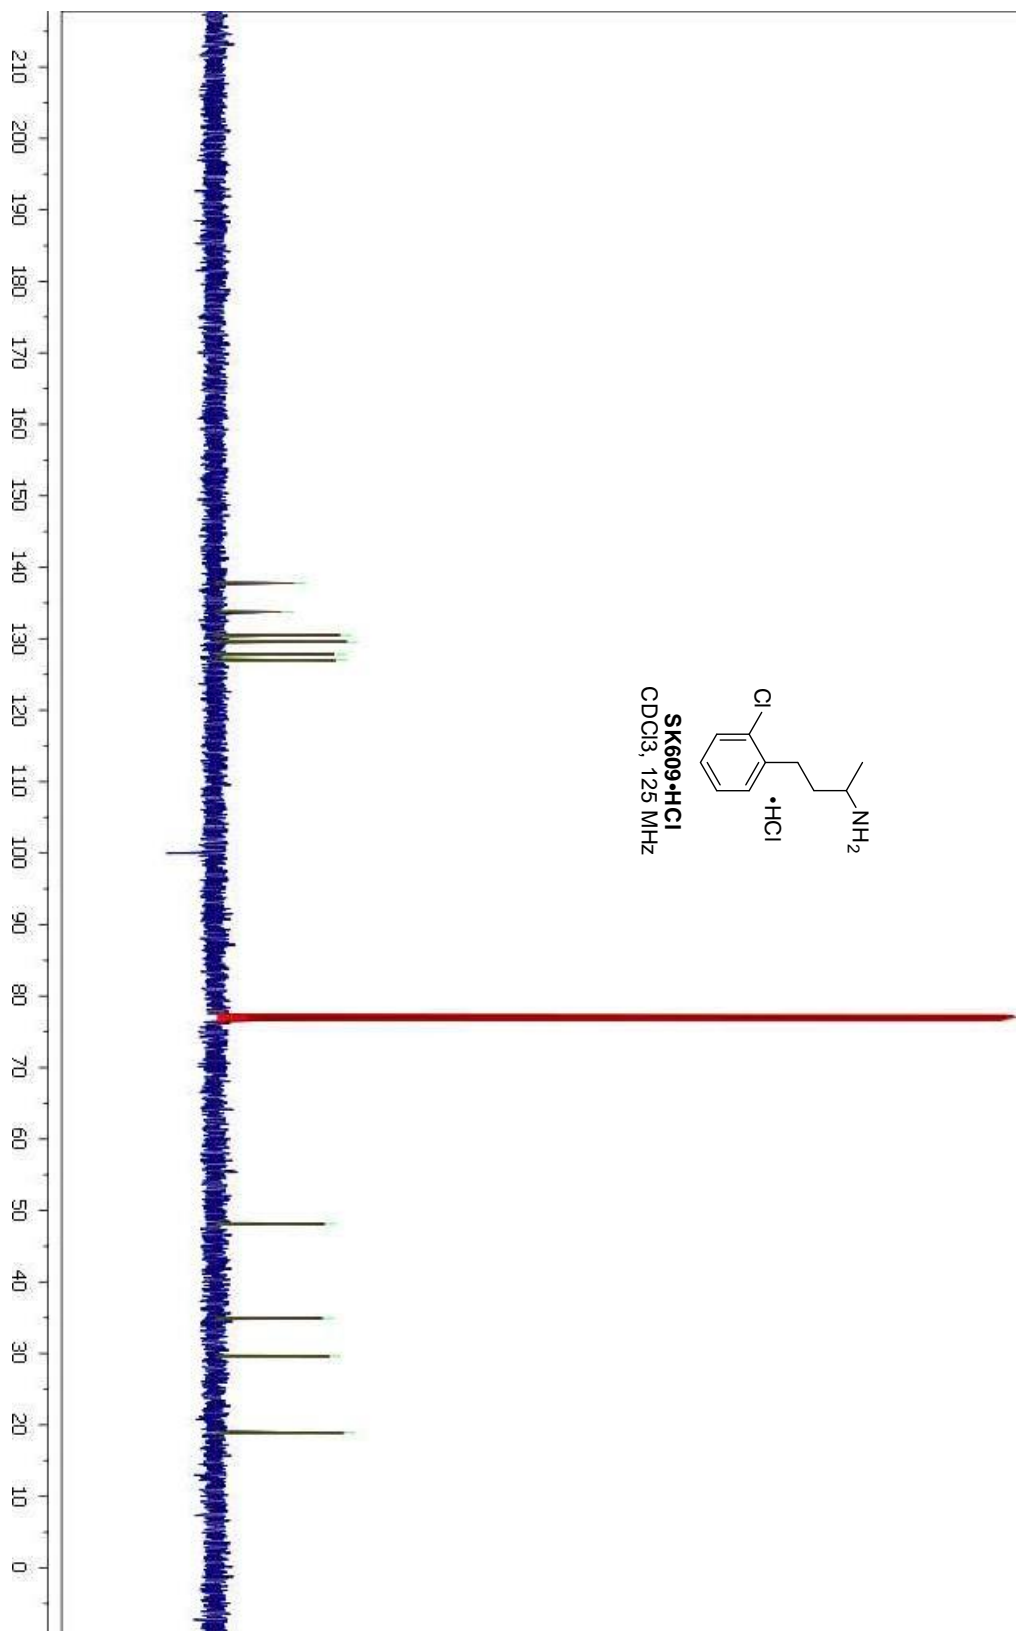

Supplementary Figure 1: Dose-response curves of ERK1/2 phosphorylation induced by DA, SK609, SK213 and SK232 at CHO-D3R. CHO cells overexpressing D3R were pretreated with vehicle, indicated concentrations of DA, SK609, SK213 or SK232 for 5 min, washed once with PBS and lysed for western blots.

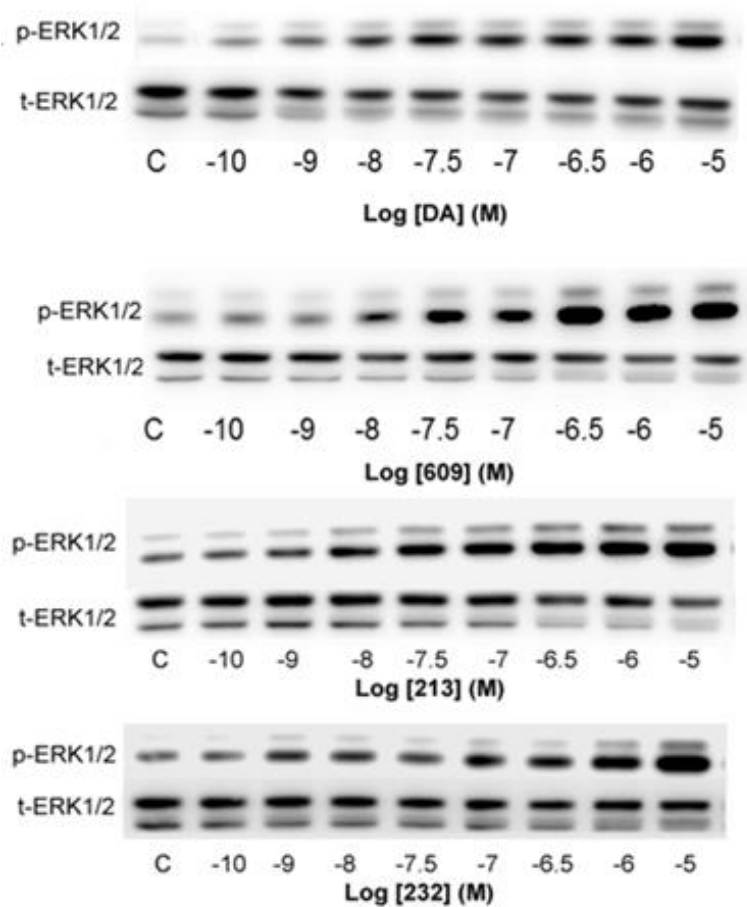

Supplementary Figure 2: LC-MS profiles of the enantiomeric forms S-SK609 and R-SK609 are shown confirming the mass and enantiomeric profiles.



S-SK609\_151001 #1-79 RT: 0.00-0.36 AV: 79 NL: 3.95E6  
T: ITMS + p APCI corona Full ms [100.00-500.00]

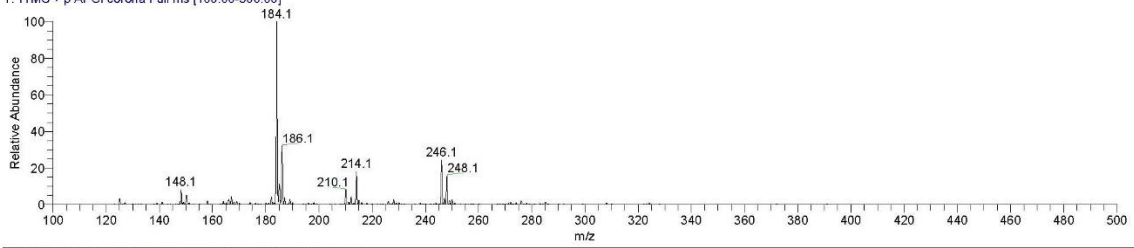

S-SK609\_151001 #92-116 RT: 0.44-0.80 AV: 25 NL: 9.85E6  
T: FTMS + p APCI corona Full ms [170.00-260.00]

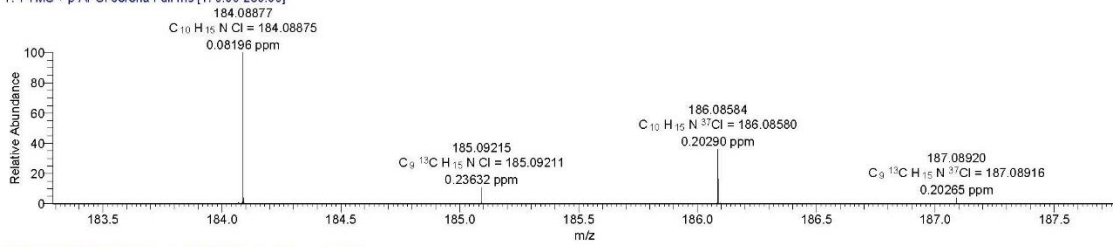

S-SK609\_151001 #92-116 RT: 0.44-0.80 AV: 25 NL: 1.46E6  
T: FTMS + p APCI corona Full ms [170.00-260.00]

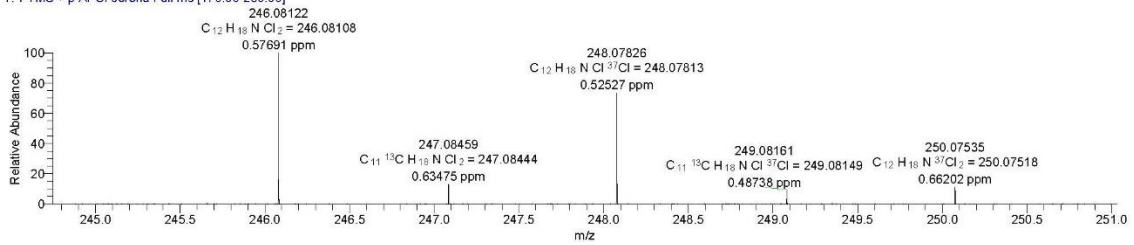

R-SK609\_151001 #1-89 RT: 0.00-0.40 AV: 89 NL: 7.48E6  
T: ITMS + p APCI corona Full ms [100.00-500.00]

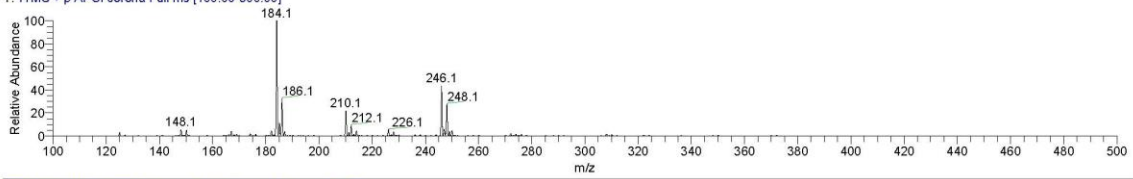

R-SK609\_151001 #97-131 RT: 0.50-1.00 AV: 35 NL: 3.01E7  
T: FTMS + p APCI corona Full ms [170.00-260.00]

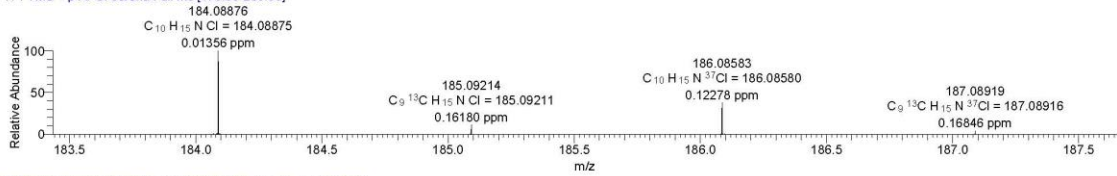

R-SK609\_151001 #97-131 RT: 0.50-1.00 AV: 35 NL: 6.28E6  
T: FTMS + p APCI corona Full ms [170.00-260.00]

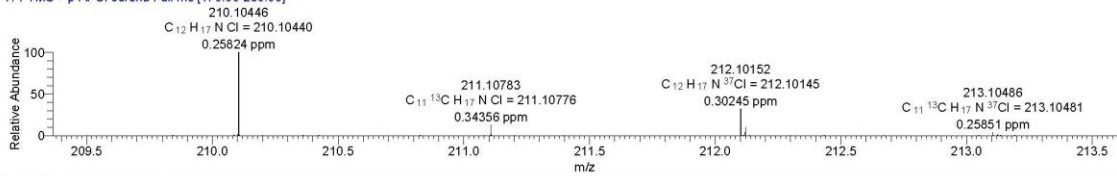

R-SK609\_151001 #97-131 RT: 0.50-1.00 AV: 35 NL: 8.21E6  
T: FTMS + p APCI corona Full ms [170.00-260.00]

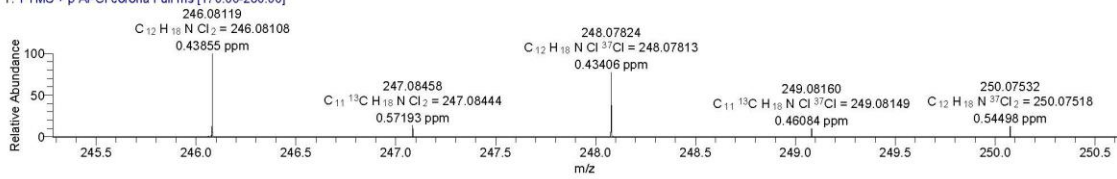

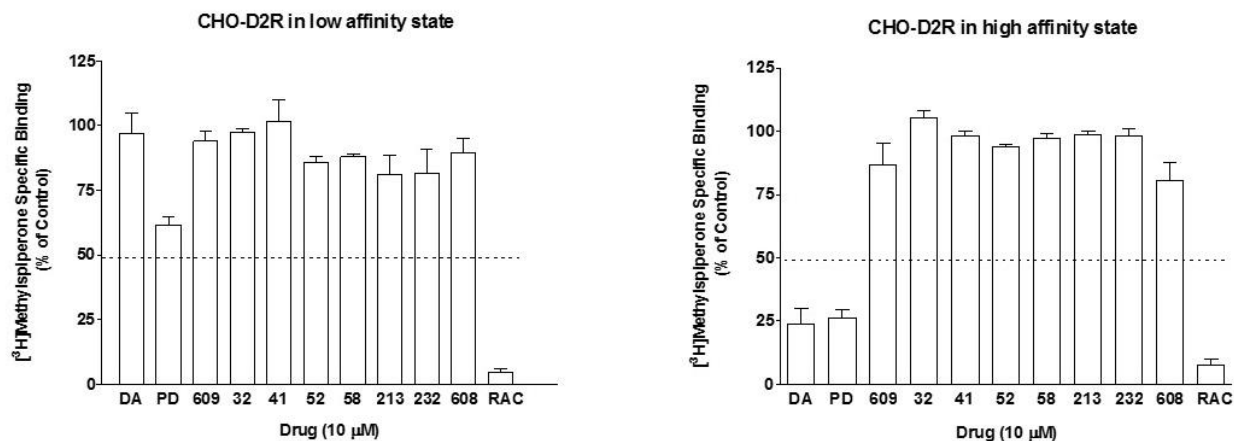

**Supplementary Figure 3: Comparison of binding affinity of SK609 and its analogues to CHO-D2R in the low affinity state and the high affinity state.** Two binding buffers were used to determine the affinity of reference compounds DA and PD128907 and D2-like antagonist raclopride and test compounds in competing for the binding of [<sup>3</sup>H]methylspiperone to CHO-D2R: Na<sup>+</sup>-GTP $\gamma$ S binding buffer (50 mM Tris-HCl, pH 7.4, with 154 mM NaCl, 0.025% ascorbic acid, 10  $\mu$ M GTP $\gamma$ S, and 0.001% bovine serum albumin), which converts the receptors to a low affinity state for agonists, and Mg<sup>2+</sup> binding buffer (50 mM Tris-HCl, pH 7.4, 6 mM MgCl<sub>2</sub>, 0.025% ascorbic acid, and 0.001% bovine serum albumin) for high-affinity state agonist binding. For converting the receptors to a high affinity state, membranes were preincubated with 100  $\mu$ M GDP and 100 mM NaCl for 30 min at room temperature and washed and centrifuged at 40,000  $\times$  g for 15 min to remove excess Na<sup>+</sup> and GDP from membranes, which promotes the receptors to a high affinity state for agonists in the presence of Mg<sup>2+</sup>. [<sup>3</sup>H]methylspiperone (about 0.25 nM) binding to D2R was conducted with vehicle or 10  $\mu$ M of DA and PD128907 and raclopride (RAC) or test compounds for 1 h at 30<sup>0</sup>C in the

two binding buffer, respectively. 10  $\mu$ M haloperidol was used to define nonspecific binding.
